# Supplementary material for: A single H-bond triggers the formation of a cleft around Et3NH+ through bond rearrangement and rotations of arms in both Co(iii) and Fe(iii) complexes
Source: Royal Society of Chemistry journal article supplement (doi:10.1039/d4dt02515f), 2024-01-01
Supplement: d4dt02515f1.pdf [file d4dt02515f1.pdf]

## Supporting Information

# A single H-bond triggers the formation of a cleft around Et<sub>3</sub>NH<sup>+</sup> through bond rearrangement and rotations of arms in both Co(III) and Fe(III) complexes

Somnath Paik, and Manabendra Ray\*

---

|                                                                 |                    |
|-----------------------------------------------------------------|--------------------|
| A. Synthesis and characterization data of the ligand            | <b>Pages 2-4</b>   |
| B. Synthesis and characterization data of the complexes         | <b>Pages 5-10</b>  |
| C. <sup>1</sup> H NMR plots of the Co(III) complexes            | <b>Pages 11-14</b> |
| D. <sup>1</sup> H NMR plots of the transformations in solution. | <b>Pages 15-17</b> |
| E. UV-visible and CD spectral plot and Table                    | <b>Pages 18-19</b> |
| F. Single crystal X-ray structural tables                       | <b>Pages 20-37</b> |
| G. FTIR of the complexes                                        | <b>Pages 38-40</b> |

---

## A. Synthesis and characterization data of the ligand.

**H<sub>2</sub>L<sup>L-Trp</sup>**. At room temperature, L-Tryptophan (3.0 g, 14.7 mmol) and LiOH.H<sub>2</sub>O (0.616 g, 14.7 mmol) were dissolved in 30 mL of methanol and stirred for 10 min, giving a colorless solution. The methanolic solution of *o*-vanillin was added to this solution, and immediately it became yellow-colored. The solution was stirred for 45 min, and then solid NaBH<sub>4</sub> (0.667 g, 17.6 mmol) was slowly added to the solution with constant stirring. The yellow-colored solution became colorless within a few minutes, and the reaction mixture was stirred for another 30 min. Then, the solvent was removed using a rotary evaporator, which gave a sticky mass. That sticky solid was dissolved in 10 mL water and acidified with dilute HCl to pH 6-5. White-colored solid precipitated out and was filtered, washed with water and cold ethanol, and dried under a vacuum desiccator.

Yield: 92 %. <sup>1</sup>H NMR (CD<sub>3</sub>OD, 500 MHz) δ 7.55 (d, 1H, *J* = 8 Hz, H<sup>12</sup>), δ 7.38 (d, 1H, *J* = 8 Hz, H<sup>15</sup>), δ 7.19 (s, 1H, H<sup>17</sup>), δ 7.13 (t, 1H, *J* = 7.5 Hz, H<sup>14</sup>), δ 6.99 (t, 1H, *J* = 8 Hz, H<sup>13</sup>), δ 6.85 (d, 1H, *J* = 8 Hz, H<sup>3</sup>), δ 6.68 (t, 1H, *J* = 8 Hz, H<sup>4</sup>), δ 6.48 (d, 1H, *J* = 8 Hz, H<sup>5</sup>), δ 4.04 (d, 1H, *J* = 13 Hz, H<sup>7</sup>), δ 3.88 (d, 1H, *J* = 13 Hz, H<sup>7a</sup>), δ 3.86 (dd, 1H, *J* = 4.5, 8 Hz, H<sup>8</sup>), δ 3.77 (s, 3H, H<sup>-OCH<sub>3</sub></sup>), δ 3.56 (dd, *J* = 4.5/8, 14.5 Hz, 1H, H<sup>9</sup>), δ 3.14 (dd, 1H, *J* = 4.5/8, 14.5 Hz, H<sup>9a</sup>); FTIR (KBr, cm<sup>-1</sup>): ν(COO<sup>-</sup>)<sub>asym</sub> 1607; ν(COO<sup>-</sup>)<sub>sym</sub> 1400; ν(C-O) 1243; ν(C-H)<sub>o/p-ring</sub> H 750. *m/z* (ESI-MS) {M+H}<sup>+</sup>, {(H<sub>2</sub>L<sup>L-Trp</sup>)+H}<sup>+</sup>; calcd: 341.15, found: 341.15.

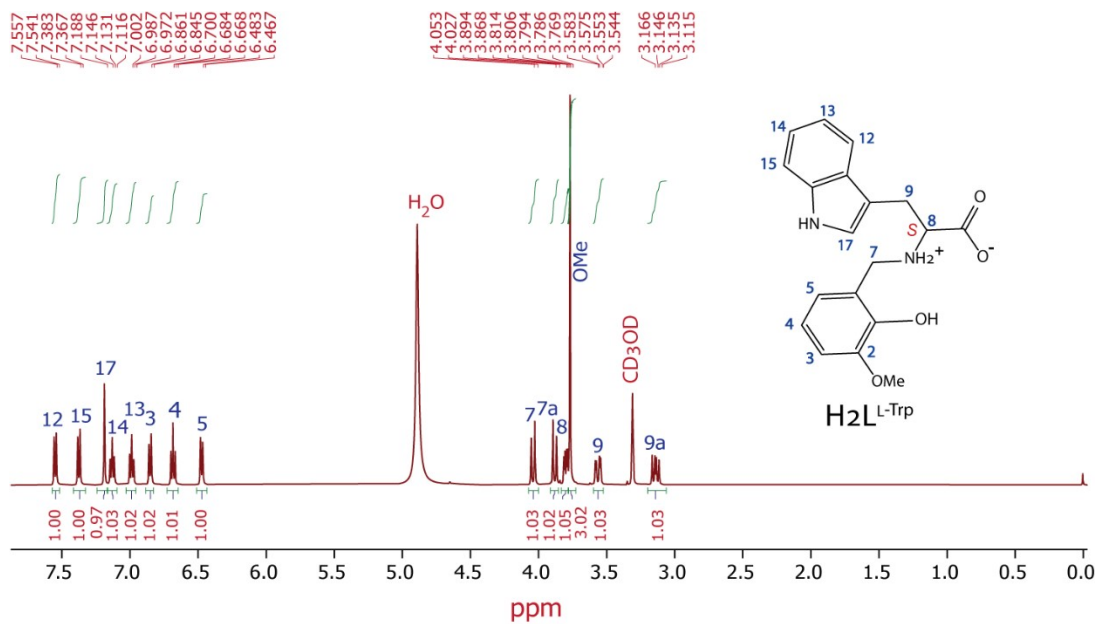

Figure S1.  $^1H$  NMR (500 MHz,  $CD_3OD$ ) of  $H_2L^{L-Trp}$ .

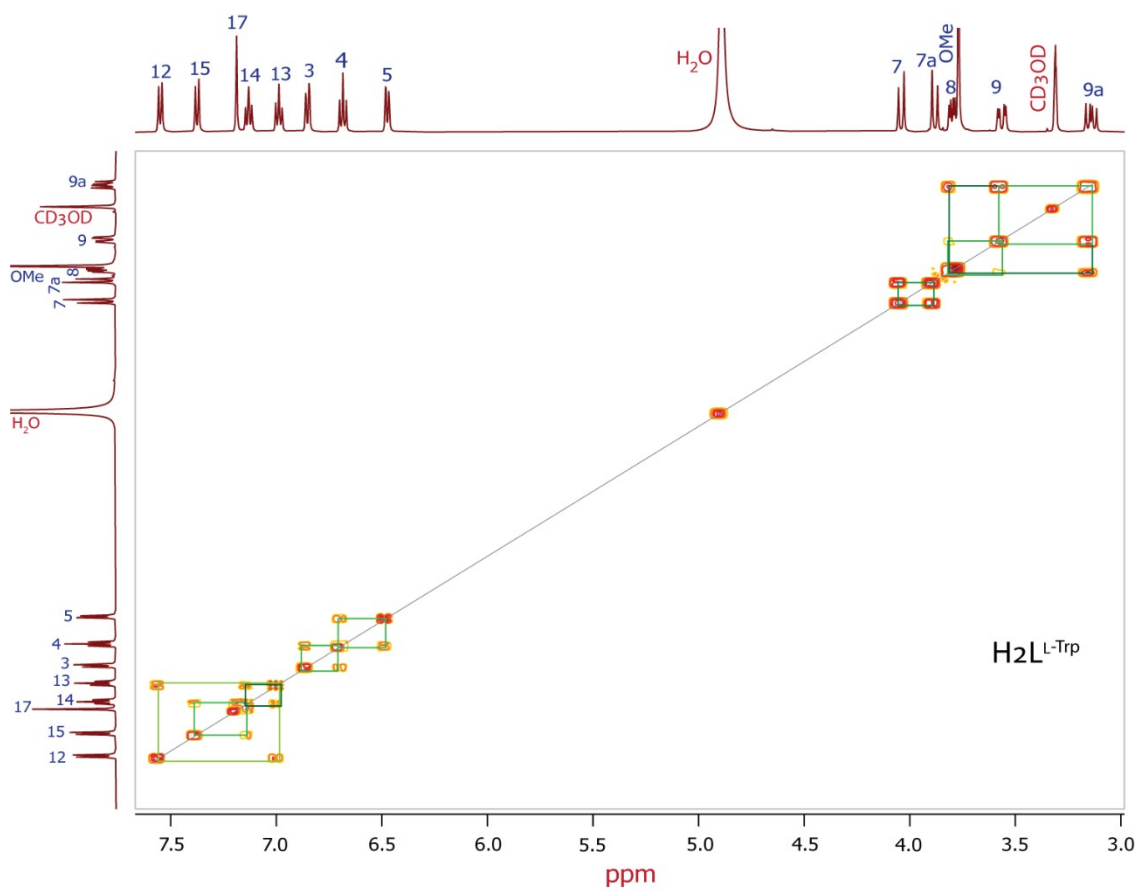

Figure S2.  $^1H$ - $^1H$  COSY NMR (500 MHz,  $CD_3OD$ ) of  $H_2L^{L-Trp}$ .

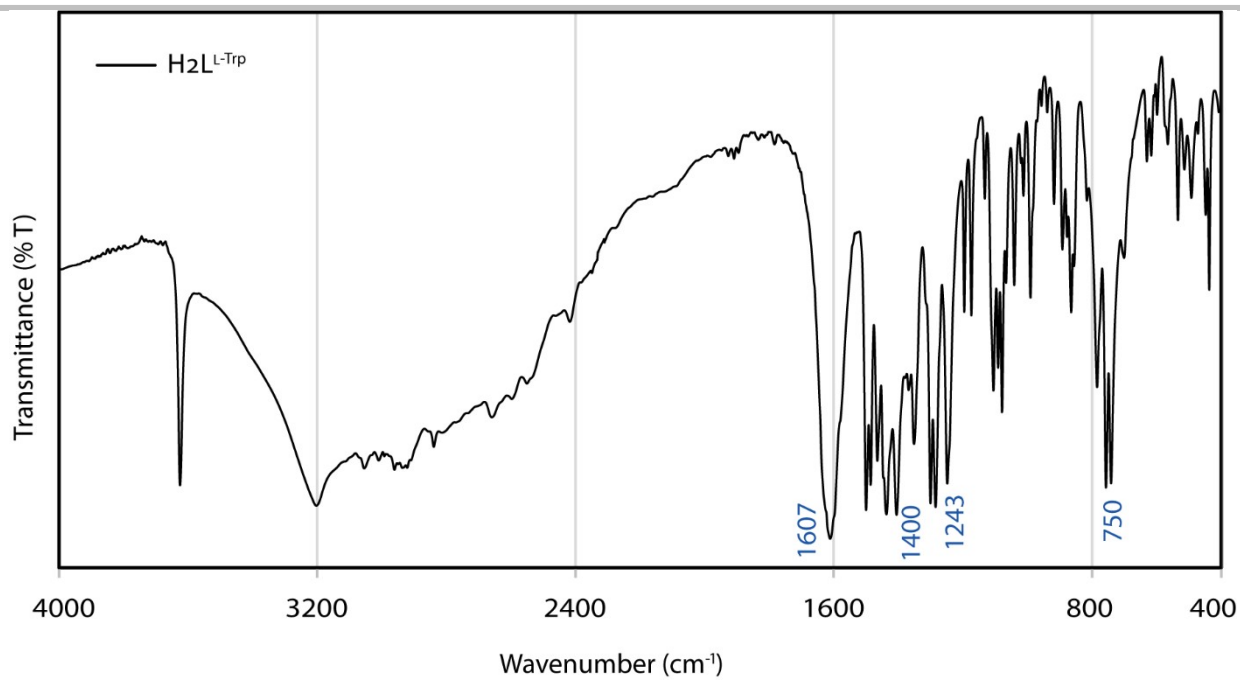

**Figure S3.** FTIR spectrum of  $H_2L^{L-Trp}$ .

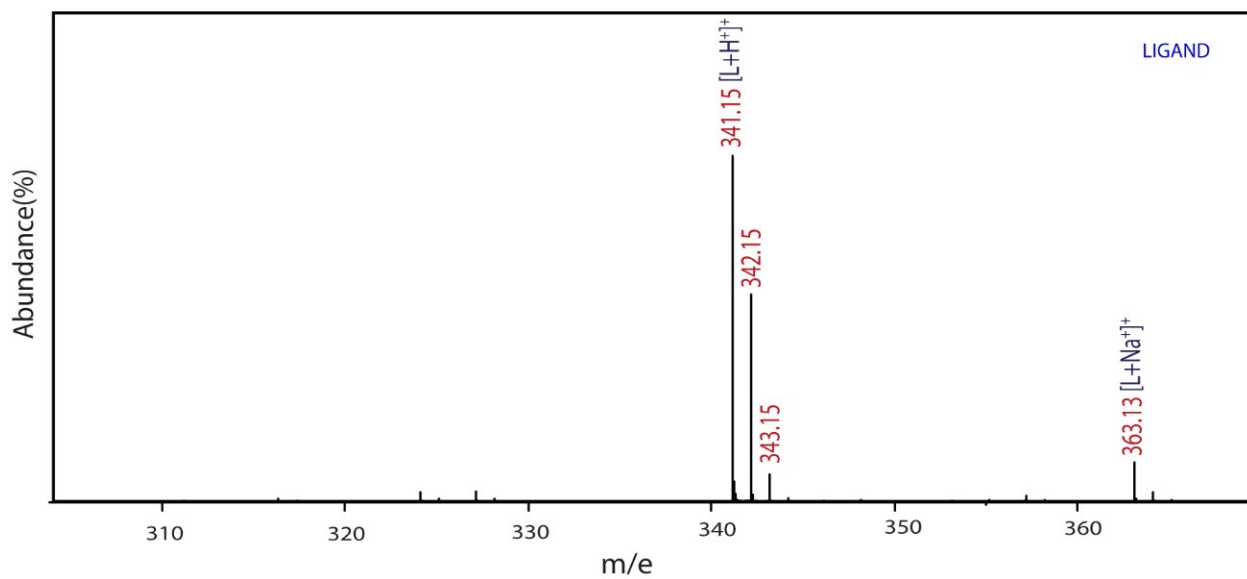

**Figure S4.** ESI-MS (+ve) spectrum of  $H_2L^{L-Trp}$  in MeOH.

## B. Synthesis and characterization data of the complexes.

**(NEt<sub>4</sub>)[Co(L<sup>L</sup>-Trp)<sub>2</sub>] (1).** Solid Co(ClO<sub>4</sub>)<sub>2</sub>.6H<sub>2</sub>O (0.269 g, 0.735 mmol) was added to the methanolic solution (10 mL) of H<sub>2</sub>L<sup>L</sup>-Trp (0.500 g, 1.47 mmol) and the reaction mixture was stirred for 15 min. The colour of the reaction mixture became pink. After 15 min., tetraethyl ammonium hydroxide solution (2.16 g, 14.7 mmol, 20 wt% in water) was slowly added to the reaction mixture, and the colour of the reaction mixture gradually changed from pink to reddish brown. The reaction mixture was stirred again for 6 h. at room temperature. Then, the solvent was evaporated using a rotary evaporator to reduce the volume of the reaction mixture, and DMF was added to it in a proportion of 3:1 (methanol: DMF) and was kept in a 50 mL beaker. Diamond-shaped reddish-brown coloured crystals were obtained after 8-10 days of slow evaporation. Crystals were washed with ethyl acetate and diethyl ether and dried under a vacuum. Yield: 72%.

<sup>1</sup>H NMR (*d*<sub>6</sub>-DMSO, 500 MHz) δ 10.87 (s, 2H, H<sup>NH</sup> indole), δ 7.82 (d, 2H, *J* = 8 Hz, H<sup>12</sup>), δ 7.30 (d, 2H, *J* = 8 Hz, H<sup>15</sup>), δ 7.20 (s, 2H, H<sup>17</sup>), δ 7.04 (t, 2H, *J* = 7 Hz, H<sup>14</sup>), δ 6.98 (t, 2H, *J* = 8 Hz, H<sup>13</sup>), δ 6.55 (d, 2H, *J* = 7.5 Hz, H<sup>5</sup>), δ 6.17 (d, 2H, *J* = 7.5 Hz, H<sup>3</sup>), δ 6.03 (t, 2H, *J* = 7.5 Hz, H<sup>4</sup>), δ 5.48 (t, 2H, *J* = 11 Hz, H<sup>NH</sup> LIGAND), δ 4.10 (dd, 2H, *J* = 4.5, 5.5 Hz, H<sup>8</sup>), δ 4.17 (t, 2H, *J* = 12 Hz, H<sup>7</sup>), δ 3.86 (d, 2H, *J* = 10.5 Hz, H<sup>7a</sup>), δ 3.79 (dd, *J* = 4.5/5.5, 16 Hz 2H, H<sup>9</sup>), δ 3.40 (dd, 2H, *J* = 4.5/5.5, 16 Hz, H<sup>9a</sup>), δ 3.18 (q, 8H, *J* = 7 Hz, H<sup>CH2</sup>), δ 2.45 (s, 6H, H<sup>OCH3</sup>), δ 1.13 (t, 12H, *J* = 7 Hz, H<sup>CH3</sup>); <sup>1</sup>H-<sup>1</sup>H-COSY was also performed. Anal. Calcd for (NEt<sub>4</sub>)[Co(L<sup>L</sup>-Trp)<sub>2</sub>]: C, 63.80; H, 6.52; N, 8.09. Found: C, 63.887; H, 6.83; N, 8.122. IR (KBr, cm<sup>-1</sup>): ν(COO<sup>-</sup>)<sub>asym</sub> 1646; ν(COO<sup>-</sup>)<sub>sym</sub> 1450; ν(C-O) 1284; ν(C-H)<sub>o/p</sub>-ring H 757; ν(M-O) 527; ν(M-N) 426. *m/z* (ESI-MS) {M+H}<sup>+</sup>, {[NEt<sub>4</sub>][Co(L<sup>L</sup>-Trp)<sub>2</sub>]+H}<sup>+</sup>; calcd: 866.35, found: 866.35.

**(Et<sub>3</sub>NH)[Co(L<sup>L</sup>-Trp)<sub>2</sub>] (2).** Solid Co(ClO<sub>4</sub>)<sub>2</sub>.6H<sub>2</sub>O (0.269 g, 0.735 mmol) was added to the methanolic solution (10 mL) of H<sub>2</sub>L<sup>L</sup>-Trp (0.500 g, 1.47 mmol) and the reaction mixture was stirred for 15 min. The colour of the reaction mixture became pink. After 15 min., methanolic solution (10 mL) of triethyl amine (0.298 g, 2.95 mmol) was slowly added to the reaction mixture, and the colour of the reaction mixture gradually changed from pink to light purple to reddish brown. The reaction mixture was stirred again for 6 h. at room temperature and evaporated using a rotary evaporator to reduce the volume. Acetonitrile was

added to it in a proportion of 1:3 (methanol: acetonitrile). Block-shaped dark brown coloured crystals were obtained after 3-4 days of slow evaporation. Crystals were washed with ethyl acetate and diethyl ether and dried under a vacuum. Yield: 75%.

$^1\text{H}$  NMR ( $d_6$ -DMSO, 500 MHz)  $\delta$  10.93 (s, 2H,  $\text{H}^{\text{NH indole}}$ ),  $\delta$  8.95 (s, 1H,  $\text{H}^{\text{NH TEA}}$ ),  $\delta$  7.83 (d, 2H,  $J = 7.5$  Hz,  $\text{H}^{12}$ ),  $\delta$  7.34 (d, 2H,  $J = 8$  Hz,  $\text{H}^{15}$ ),  $\delta$  7.21 (s, 2H,  $\text{H}^{17}$ ),  $\delta$  7.08 (t, 2H,  $J = 7.5$  Hz,  $\text{H}^{14}$ ),  $\delta$  7.03 (t, 2H,  $J = 7.5$  Hz,  $\text{H}^{13}$ ),  $\delta$  6.62 (d, 2H,  $J = 7.5$  Hz,  $\text{H}^5$ ),  $\delta$  6.48 (d, 2H,  $J = 7$  Hz,  $\text{H}^3$ ),  $\delta$  6.24 (t, 2H,  $J = 8$  Hz,  $\text{H}^4$ ),  $\delta$  5.55 (t, 2H,  $J = 11.5$  Hz,  $\text{H}^{\text{NH LIGAND}}$ ),  $\delta$  4.50 (dd, 2H,  $J = 4.5, 5.5$  Hz,  $\text{H}^8$ ),  $\delta$  4.11 (t, 2H,  $J = 11.5$  Hz,  $\text{H}^7$ ),  $\delta$  3.75-3.65 (m, 4H,  $\text{H}^{7a,9}$ ),  $\delta$  3.54 (s, 6H,  $\text{H}^{\text{OCH}_3}$ ),  $\delta$  3.39 (dd, 2H,  $J = 4.5/5.5, 16$  Hz,  $\text{H}^{9a}$ ),  $\delta$  2.93 (q, 6H,  $J = 7$  Hz,  $\text{H}^{\text{CH}_2}$ ),  $\delta$  1.06 (t, 9H,  $J = 7$  Hz,  $\text{H}^{\text{CH}_3}$ );  $^1\text{H}$ - $^1\text{H}$ -COSY was also performed. Anal. Calcd for  $(\text{Et}_3\text{NH})[\text{Co}(\text{L}^{\text{L-Trp}})_2]$ : C, 63.07; H, 6.25; N, 8.36. Found: C, 62.708; H, 6.143; N, 8.034. IR (KBr,  $\text{cm}^{-1}$ ):  $\nu(\text{COO}^-)_{\text{asym}}$  1615, 1596;  $\nu(\text{COO}^-)_{\text{sym}}$  1458;  $\nu(\text{C-O})$  1281;  $\nu(\text{C-H})_{\text{o/p-ring H}}$  744;  $\nu(\text{M-O})$  532;  $\nu(\text{M-N})$  431.  $m/z$  (ESI-MS)  $\{M+H\}^+$ ,  $\{[(\text{Et}_3\text{NH})[\text{Co}(\text{L}^{\text{L-Trp}})_2]+H]\}^+$ ; calcd: 838.32, found: 838.32.

**$(\text{Et}_3\text{NH})[\text{Co}(\text{L}^{\text{L-Trp}})_2]$  (3).** Complex **1** (0.100 g, 0.115 mmol) was dissolved in 8 mL methanol, and methanolic solution (2 mL) of triethylammonium perchlorate (0.070 g, 0.374 mmol) was added to it and kept for stirring. After 10 min stirring, some solid precipitation appeared. Then filtered, filtrate was collected in a 25 mL beaker and kept for slow evaporation of the solvent at room temperature. Orange-red colored crystalline solids were obtained after 3 days. The crystals were filtered, washed with acetonitrile and diethyl ether, and dried in a vacuum. Yield: 0.084 g.

$^1\text{H}$  NMR ( $d_6$ -DMSO, 500 MHz)  $\delta$  10.86 (s, 2H,  $\text{H}^{\text{NH indole}}$ ),  $\delta$  8.83 (s, 1H,  $\text{H}^{\text{NH TEA}}$ ),  $\delta$  7.82 (d, 2H,  $J = 8$  Hz,  $\text{H}^{12}$ ),  $\delta$  7.30 (d, 2H,  $J = 8$  Hz,  $\text{H}^{15}$ ),  $\delta$  7.20 (s, 2H,  $\text{H}^{17}$ ),  $\delta$  7.04 (t, 2H,  $J = 7$  Hz,  $\text{H}^{14}$ ),  $\delta$  6.98 (t, 2H,  $J = 8$  Hz,  $\text{H}^{13}$ ),  $\delta$  6.54 (d, 2H,  $J = 7.5$  Hz,  $\text{H}^5$ ),  $\delta$  6.17 (d, 2H,  $J = 7.5$  Hz,  $\text{H}^3$ ),  $\delta$  6.03 (t, 2H,  $J = 7.5$  Hz,  $\text{H}^4$ ),  $\delta$  5.48 (t, 2H,  $J = 11$  Hz,  $\text{H}^{\text{NH LIGAND}}$ ),  $\delta$  4.10 (dd,  $J = 4.5, 5.5$  Hz, 2H,  $\text{H}^8$ ),  $\delta$  4.18 (t, 2H,  $J = 12$  Hz,  $\text{H}^7$ ),  $\delta$  3.85 (d, 2H,  $J = 11$  Hz,  $\text{H}^{7a}$ ),  $\delta$  3.79 (dd,  $J = 4.5/5.5, 16$  Hz 2H,  $\text{H}^9$ ),  $\delta$  3.40 (dd, 2H,  $J = 4.5/5.5, 16$  Hz,  $\text{H}^{9a}$ ),  $\delta$  3.08 (q, 6H,  $J = 7$  Hz,  $\text{H}^{\text{CH}_2}$ ),  $\delta$  2.46 (s, 6H,  $\text{H}^{\text{OCH}_3}$ ),  $\delta$  1.16 (t, 9H,  $J = 7$  Hz,  $\text{H}^{\text{CH}_3}$ );  $^1\text{H}$ - $^1\text{H}$ -COSY was also performed. Anal. Calcd for  $(\text{Et}_3\text{NH})[\text{Co}(\text{L}^{\text{L-Trp}})_2]$ : C, 63.07; H, 6.25; N, 8.36. Found: C, 62.276; H, 6.203; N, 8.299. IR (KBr,  $\text{cm}^{-1}$ ):  $\nu(\text{COO}^-)_{\text{asym}}$  1657;  $\nu(\text{COO}^-)_{\text{sym}}$  1456;  $\nu(\text{C-O})$  1282;  $\nu(\text{C-H})_{\text{o/p-ring H}}$

---

754;  $\nu(\text{M-O})$  540;  $\nu(\text{M-N})$  430.  $m/z$  (ESI-MS)  $\{\text{M}+\text{H}\}^+$ ,  $\{(\text{Et}_3\text{NH})[\text{Co}(\text{L}^{\text{-Trp}})_2]+\text{H}\}^+$ ; calcd: 838.32, found: 838.32.

**(NEt<sub>4</sub>)[Fe(L<sup>L-Trp</sup>)<sub>2</sub>] (4).** Solid Fe(ClO<sub>4</sub>)<sub>2</sub>·7H<sub>2</sub>O (0.269 g, 0.735 mmol) was added to the methanolic solution (10 mL) H<sub>2</sub>L<sup>L-Trp</sup> (0.500 g, 1.47 mmol) and the reaction mixture was stirred for 15 min. The colour of the reaction mixture became bluish-purple. After 15 min., tetraethyl ammonium hydroxide solution (0.298 g, 2.94 mmol, 20 wt% in water) was slowly added to the reaction mixture and the colour of the reaction mixture gradually changed from bluish-purple to red. The reaction mixture was stirred again for 3 h. at room temperature. Then, the solvent was evaporated using a rotary evaporator to reduce the volume of the reaction mixture, and acetonitrile was added to it in a proportion of 3:1 (methanol: acetonitrile) and was kept in a 50 mL beaker. Diamond-shaped dark red coloured crystals were obtained after 8-9 days of slow evaporation. Crystals were washed with ethyl acetate and diethyl ether dried under vacuum. Yield: 65%.

Anal. Calcd for (NEt<sub>4</sub>)[Fe(L<sup>L-Trp</sup>)<sub>2</sub>]: C, 64.03; H, 6.54; N, 8.12. Found: C, 63.803; H, 7.183; N, 8.159. IR (KBr, cm<sup>-1</sup>):  $\nu(\text{COO}^-)_{\text{asym}}$  1639;  $\nu(\text{COO}^-)_{\text{sym}}$  1453;  $\nu(\text{C-O})$  1283;  $\nu(\text{C-H})_{\text{o/p-ring}}$  757;  $\nu(\text{M-O})$  579;  $\nu(\text{M-N})$  426.  $\mu_{\text{eff}}$  (solid, 292K); 5.75  $\mu\text{B}/\text{Fe}$ .  $m/z$  (ESI-MS)  $\{\text{M}+2\text{H}\}^+$ ,  $\{[\text{Fe}(\text{L}^{\text{-Trp}})_2]^-+2\text{H}\}^+$ ; calcd: 734.21, found: 734.20.

**(Et<sub>3</sub>NH)[Fe(L<sup>L-Trp</sup>)<sub>2</sub>].(Et<sub>3</sub>NHClO<sub>4</sub>) (5). Method 1 Directly from the ligand:** The ligand H<sub>2</sub>L<sup>L-Trp</sup> (0.500 g, 1.47 mmol) was dissolved in 10 mL MeOH in a 100 mL round bottom flask, and solid Fe(ClO<sub>4</sub>)<sub>2</sub>·7H<sub>2</sub>O (0.270 g, 0.735 mmol) was added into it. The colour of the solution became blue-violet and the reaction mixture was stirred for 15 min. Then, a methanolic solution (10 mL) of triethyl amine (0.446 g, 4.41 mmol) was slowly added to the reaction mixture, and the colour of the reaction mixture gradually changed from blue-violet to red-violet. The resulting red-violet solution was stirred for another 3 h. at room temperature. Solid crystalline red-violet coloured solid appeared, which was filtered off, and washed with ethyl acetate and diethyl ether. The solid was dried in a vacuum desiccator. The solid was redissolved in

---

methanol along with a few drops of DMF, and it was kept in a 25 mL beaker for slow evaporation of the solvent. Block-shaped red crystals were obtained after 3 days. Yield: 74%.

**Method 2, Synthesis from Complex 4:** Complex 4 (0.100 g, 0.116 mmol) was dissolved in 10 mL methanol, and methanolic solution (5 mL) of triethylammonium perchlorate (0.070 g, 0.347 mmol) was added to it and kept for stirring. After 15 min stirring, the red-colored solution was kept in a 25 mL conical flask, which, upon slow evaporation at room temperature, gave block-shaped red crystals of **5** after 6 days. Yield: 0.073 g

Anal. Calcd for  $(\text{Et}_3\text{NH})[\text{Fe}(\text{L}^{\text{-TTP}})_2] \cdot \text{Et}_3\text{NHClO}_4$ : C, 57.94; H, 6.61; N, 8.11. Found: C, 57.804; H, 6.581; N, 8.088. IR (KBr,  $\text{cm}^{-1}$ ):  $\nu(\text{COO}^-)_{\text{asym}}$  1600;  $\nu(\text{COO}^-)_{\text{sym}}$  1458;  $\nu(\text{C-O})$  1276;  $\nu(\text{C-H})_{\text{o/p-ring}}$  740;  $\nu(\text{M-O})$  583;  $\nu(\text{M-N})$  417.  $\mu_{\text{eff}}$  (solid, 292K); 5.8  $\mu\text{B}/\text{Fe}$ .  $m/z$  (ESI-MS)  $\{\text{M}+\text{H}\}^+$ ,  $\{(\text{HNEt}_3)[\text{Fe}(\text{L}^{\text{-TTP}})_2]+\text{H}\}^+$ ; calcd: 835.33, found: 835.27.

FTIR of **5** from Method 1 and Method 2 are identical (Figure S4A). The Crystal Structure of **5** from both methods was solved. Structural data of crystals from method 2 has been used in the manuscript. The structural parameters of the crystals and an ORTEP diagram from method 1 are in Figure S4B.

**Note.** For elemental analysis, the crystalline samples were powdered and dried under a vacuum desiccator for several days before analysis. Thus, the number and type of solvent molecules in the crystal structure and isolated product differ. We used the formula weight of the bulk for solution concentration and magnetic moment calculation.



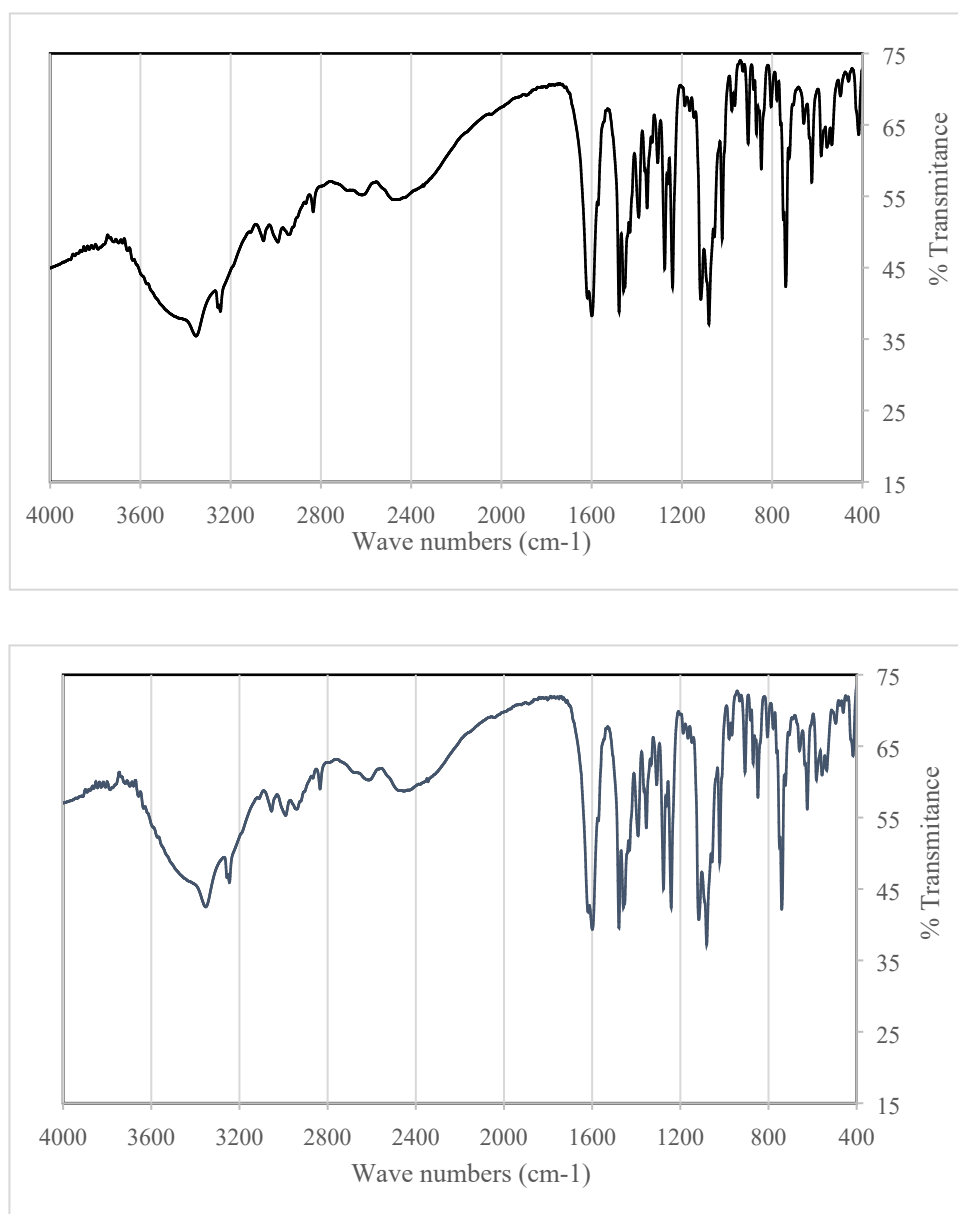

**Figure S4a.** FTIR of **5** obtained from Method 1 (Top) and Method 2 (Bottom).

**Crystal Parameter for the crystals of 5 isolated from Method 1:** Space group,  $P2_1$ ,  $a$  9.760(6) Å,  $b$  19.804 (13) Å,  $c$  27.476 Å,  $\alpha = \gamma = 90^\circ$ ,  $\beta$  93.32(3), Volume 5301.611(6) Å<sup>3</sup>,  $Z/\rho$  4/1.298,  $\mu$  0.399, Coll reflns 11205, Indep Refln 6967, FLACK param. 0.00(2), GOF 1.031,  $R1$  0.0679,  $wR2$  0.1366,  $R1$  (all data) 0.1293,  $wR2$ (all data) 0.1574. The parameters of crystals from Method 2 (used in the manuscript) are in Table S3.

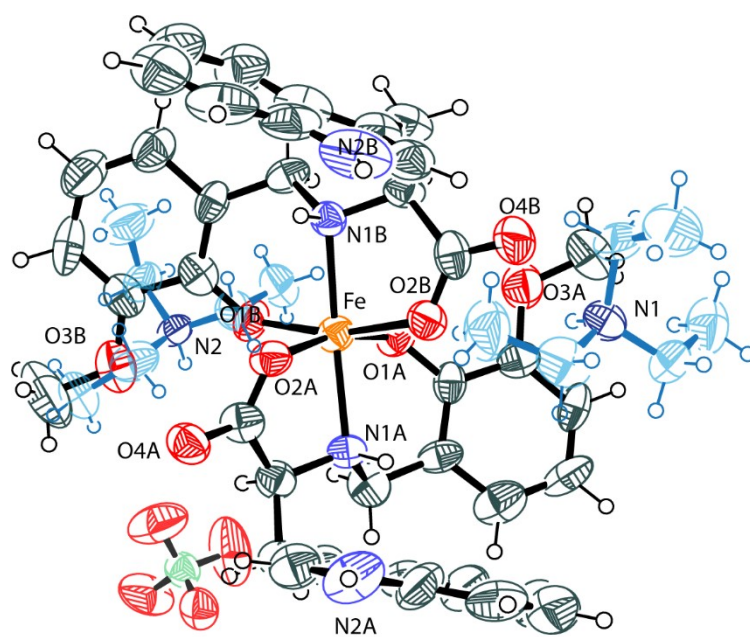

**Figure S4b.** ORTEP figure of **5** with 40% ellipsoid probability, obtained from Method 1.

### C. NMR plots of the Co(III) complexes.

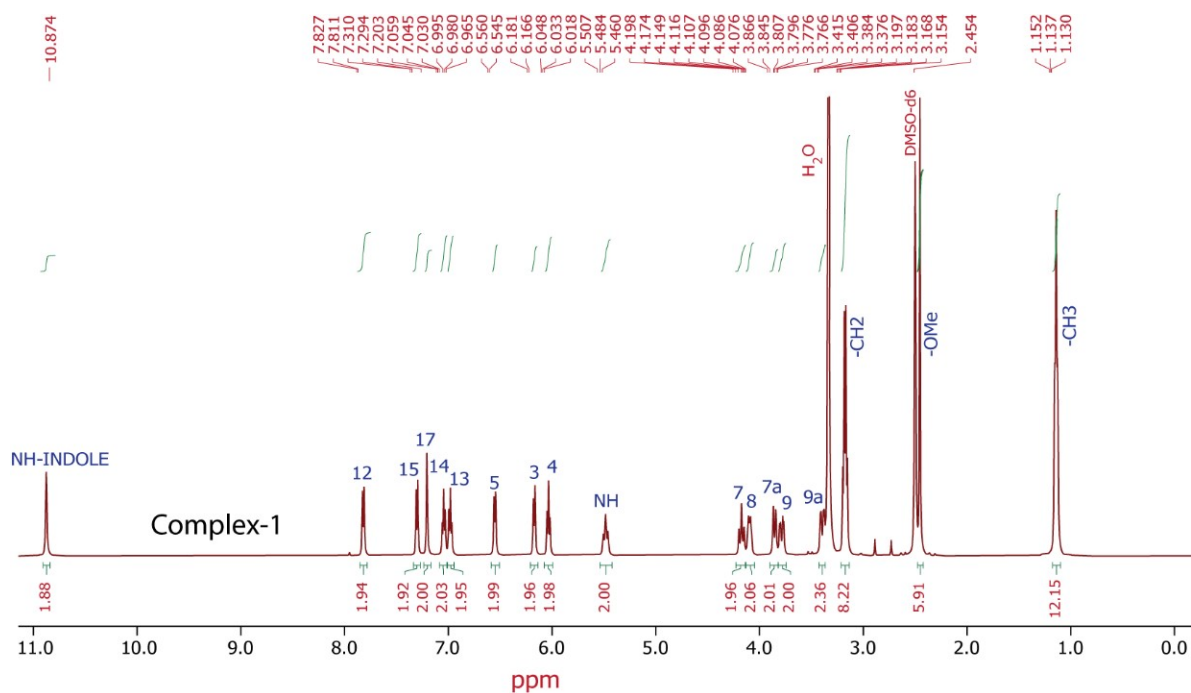

Figure S5.  $^1\text{H}$  NMR (500 MHz,  $d_6$ -DMSO) of **1**.

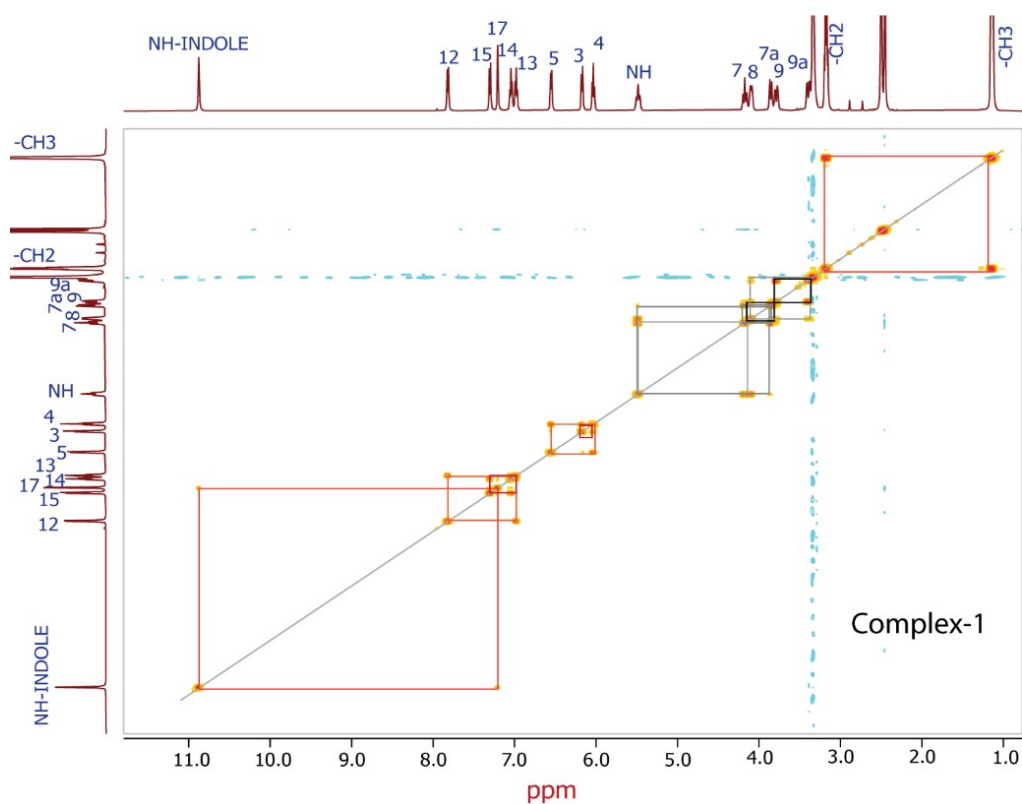

Figure S6.  $^1\text{H}$ - $^1\text{H}$  COSY NMR (500 MHz,  $d_6$ -DMSO) of **1**.

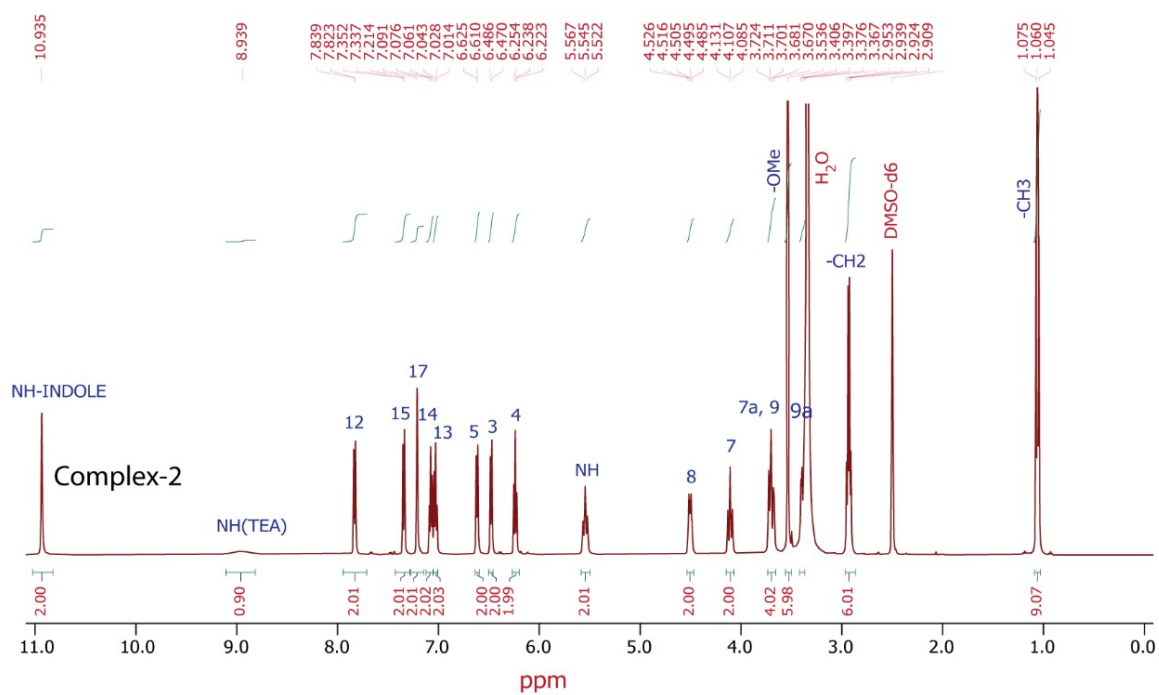

Figure S7.  $^1\text{H}$  NMR (500 MHz,  $d_6$ -DMSO) of **2**.

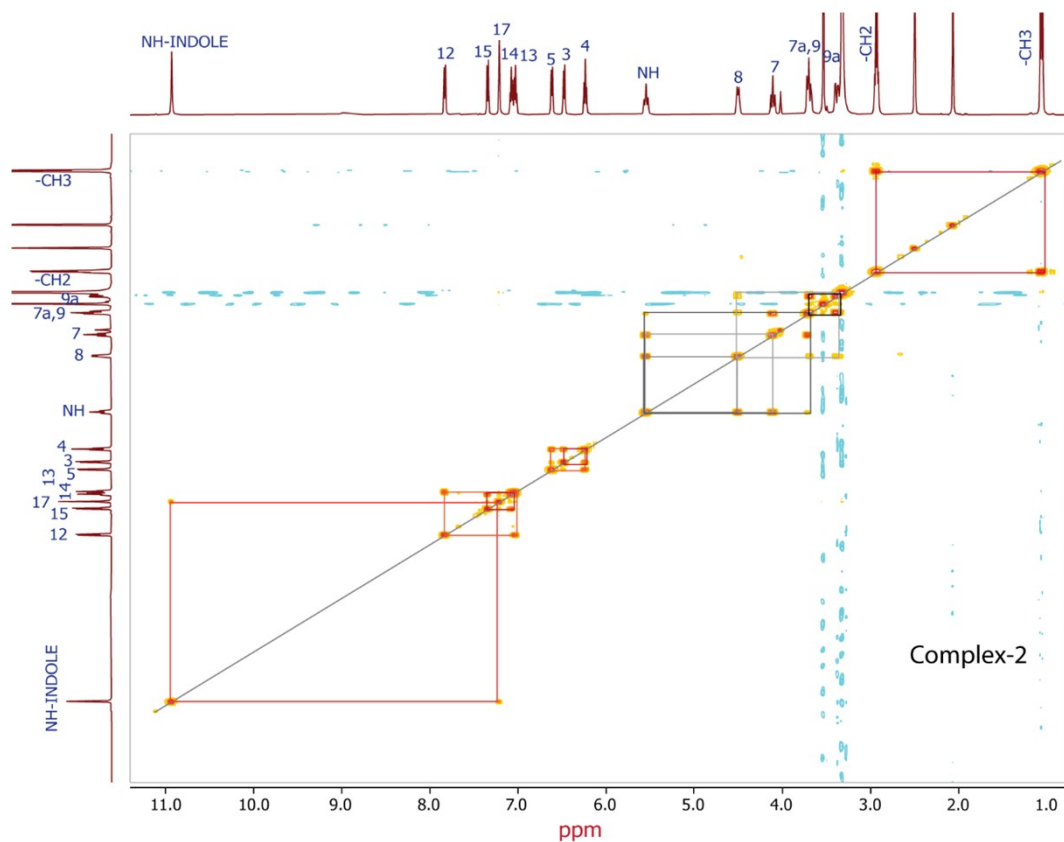

Figure S8.  $^1\text{H}$ - $^1\text{H}$  COSY NMR (500 MHz,  $d_6$ -DMSO) of **2**.

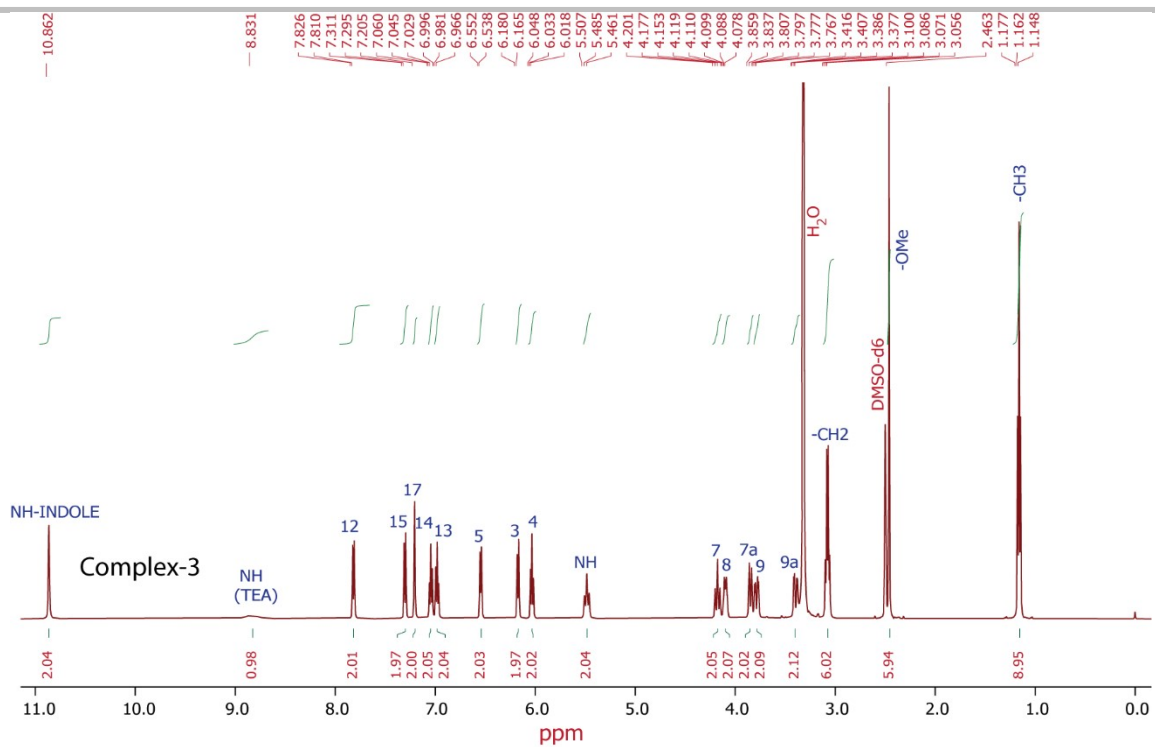

**Figure S9.**  $^1\text{H}$  NMR (500 MHz,  $d_6$ -DMSO) of **3**.

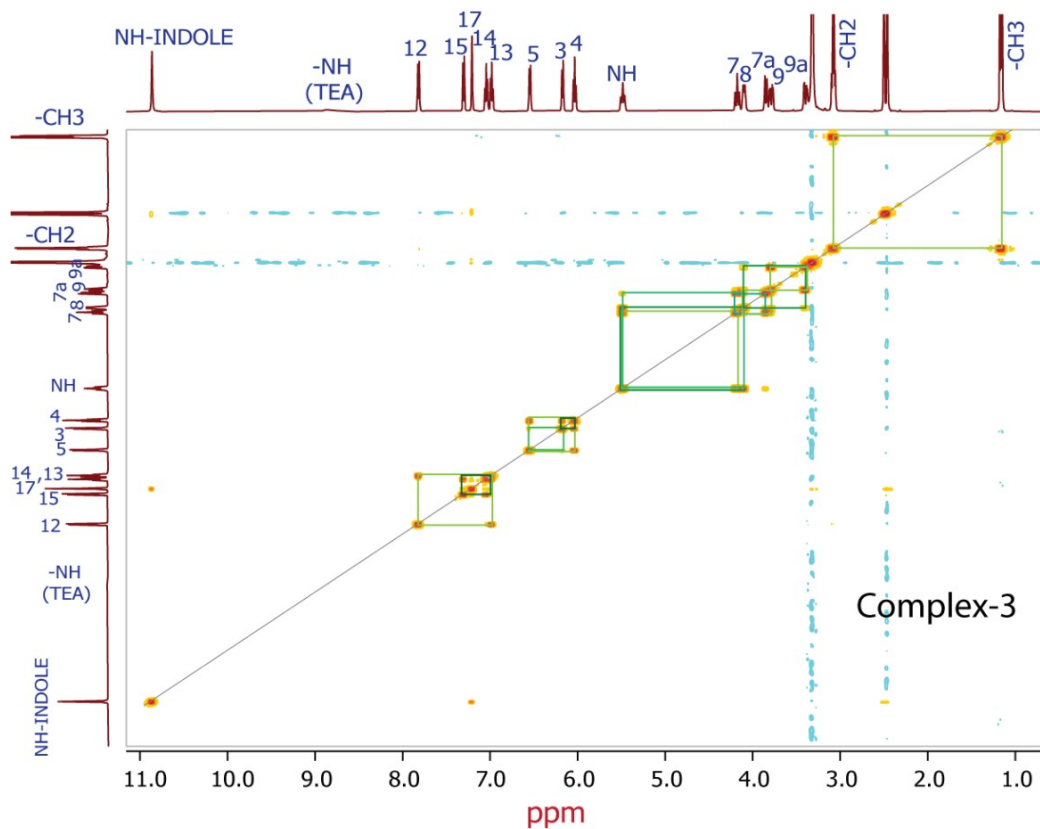

**Figure S10.**  $^1\text{H}$ - $^1\text{H}$  COSY NMR (500 MHz,  $d_6$ -DMSO) of **3**.

## The solution-state structural difference among 1, 2, and 3

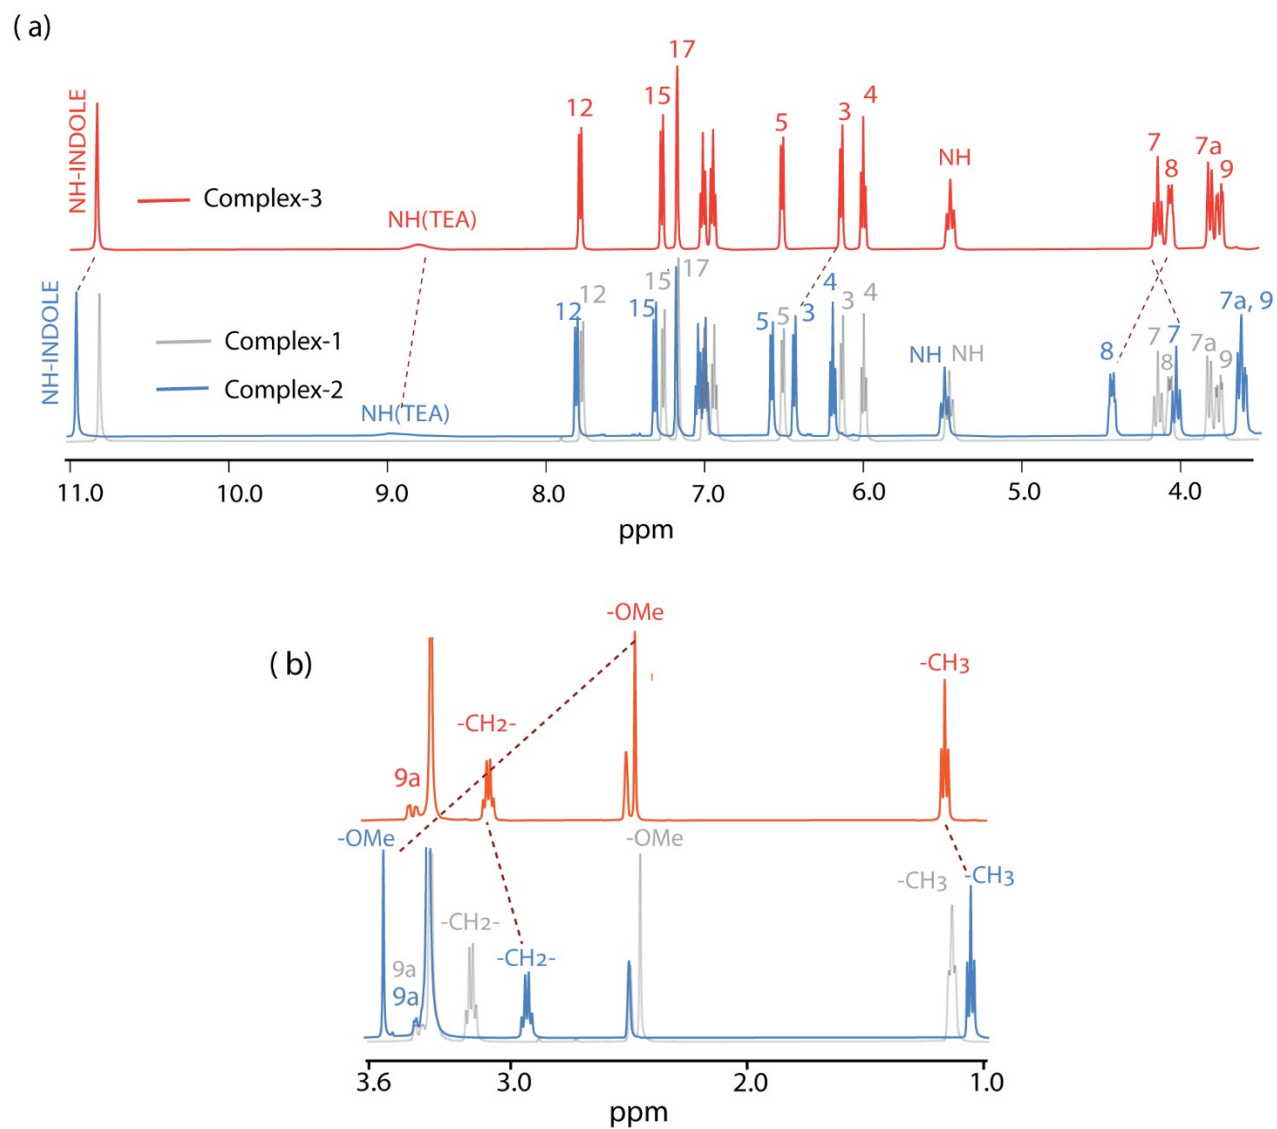

**Figure S11.** Stacked partial  $^1\text{H}$  NMR spectra (500 MHz,  $d_6$ -DMSO) of **1**, **2**, and **3** - (a) and (b) showing different  $^1\text{H}$  NMR signal positions of the similar type of protons belonging to their anionic Co(III) complex units and their respective counter ions.

#### D. $^1\text{H}$ NMR plots of the transformations in solution.

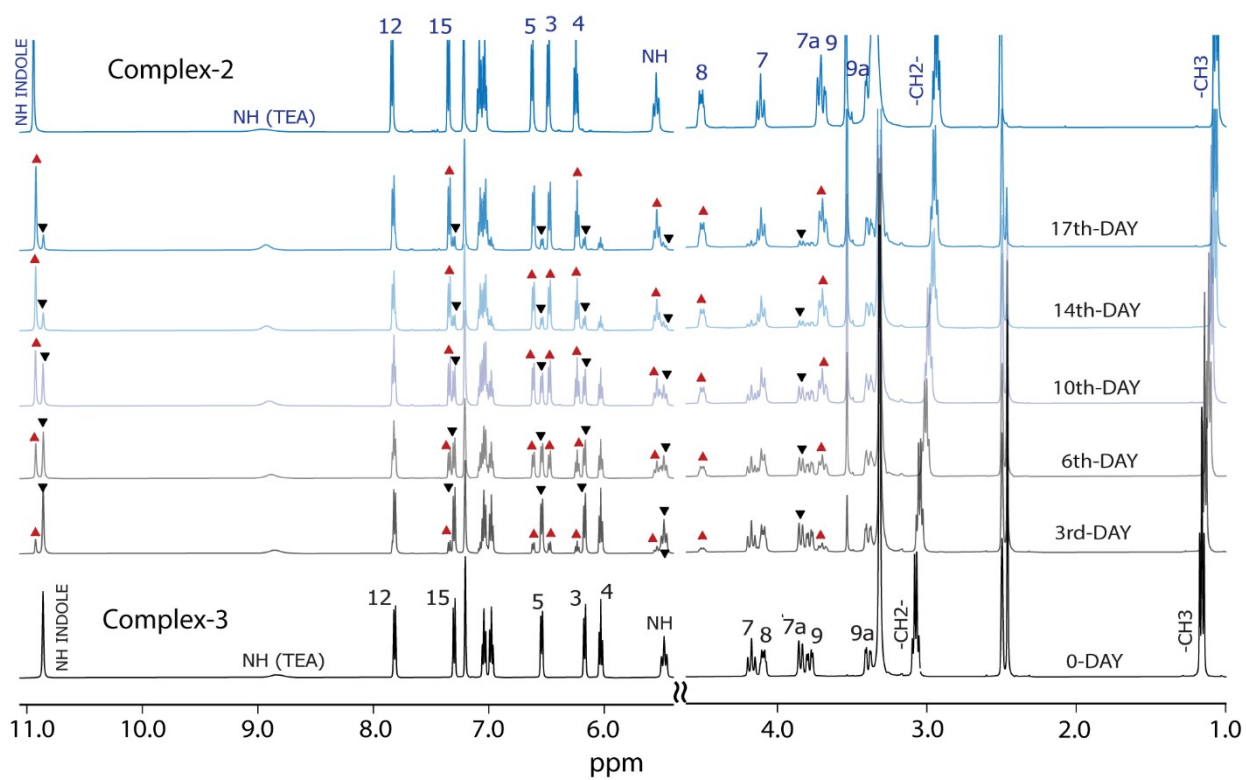

**Figure S12.** Partial stacked  $^1\text{H}$  NMR spectra (500 MHz,  $d_6$ -DMSO) showing structural transformation of **3** to **2** at room temperature.

| Protons                       | NH<br>(Indole) | NH<br>(TEA) | H13   | H5    | H3    | H4    | NH<br>(com) | H7    | H7a   | H8    | OMe   |
|-------------------------------|----------------|-------------|-------|-------|-------|-------|-------------|-------|-------|-------|-------|
| $\delta$ of <b>3</b><br>(ppm) | 10.86          | 8.83        | 6.98  | 6.55  | 6.17  | 6.03  | 5.48        | 4.18  | 3.85  | 4.10  | 2.46  |
| $\delta$ of <b>2</b><br>(ppm) | 10.93          | 8.95        | 7.03  | 6.62  | 6.48  | 6.24  | 5.55        | 4.11  | 3.71  | 4.50  | 3.54  |
| $\Delta\delta$<br>(ppm)       | -0.07          | -0.12       | -0.05 | -0.07 | -0.31 | -0.21 | -0.07       | +0.07 | +0.14 | -0.40 | -1.08 |

**Table S1.** Chemical shift differences of the similar types of protons in **2** and **3**, respectively.

Note: (-)ve  $\Delta\delta$  values indicating downfield shifting and (+)  $\Delta\delta$  values indicating upfield shifting of the  $^1\text{H}$  NMR signals.

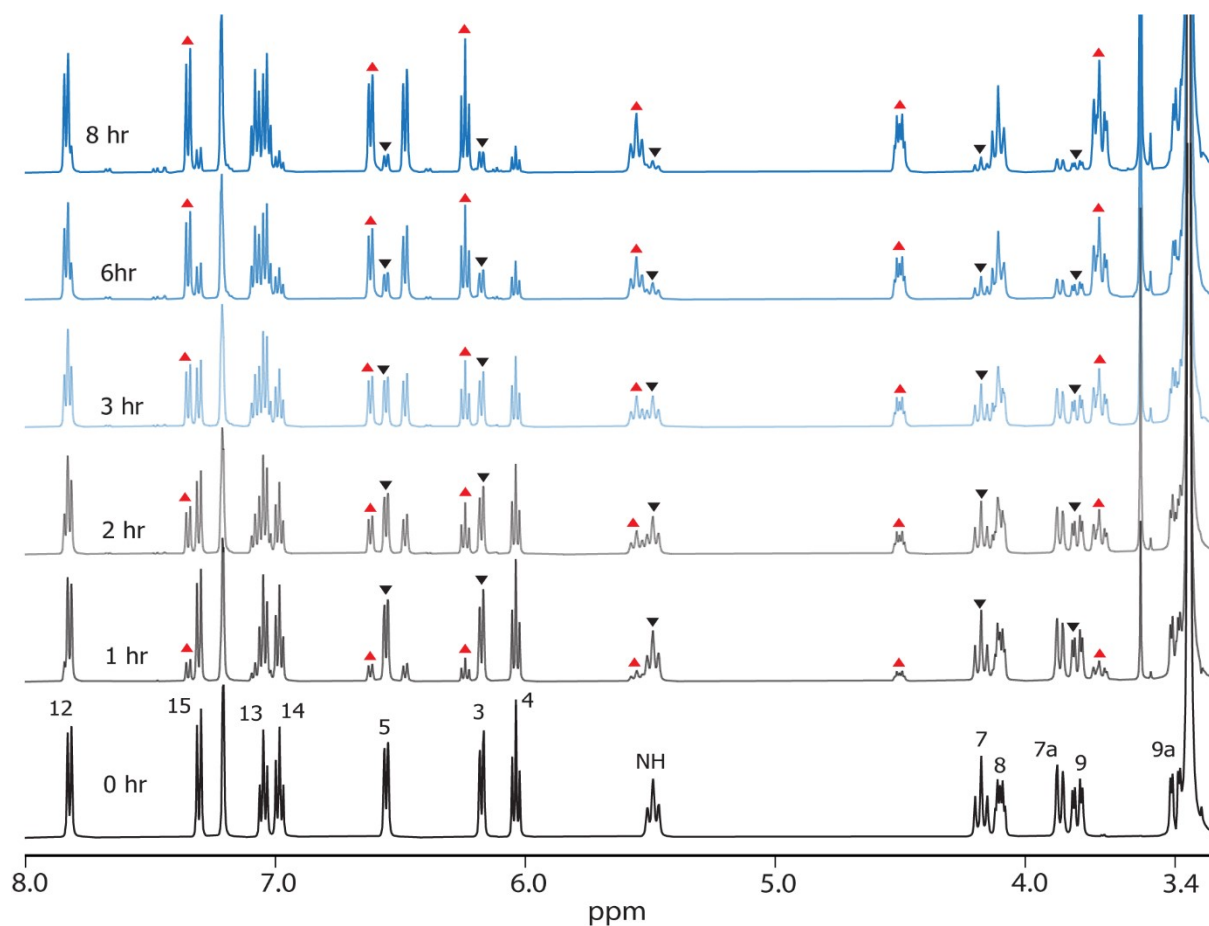

**Figure S13.** Partial stacked  $^1\text{H}$  NMR spectra (500 MHz,  $d_6$ -DMSO) of **3**, showing that the structural transformation became faster at  $60^\circ\text{C}$ .



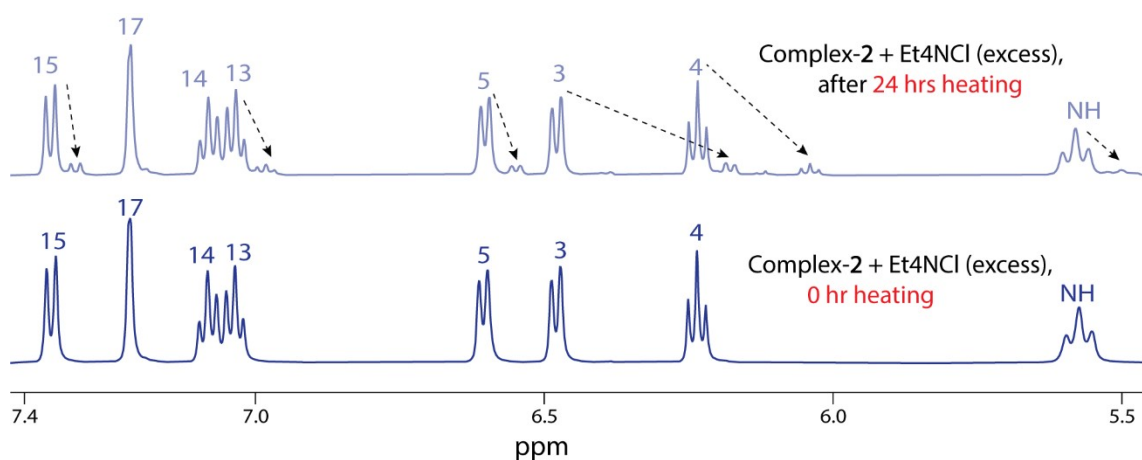

**Figure S13a.**  $^1\text{H}$  NMR spectra (**partial**) of **3** with excess  $\text{Et}_4\text{NCl}$  before and after heating at  $60^\circ\text{C}$  for 24 hrs. Spectra were recorded in  $d_6$ -DMSO using a 500 MHz NMR instrument.

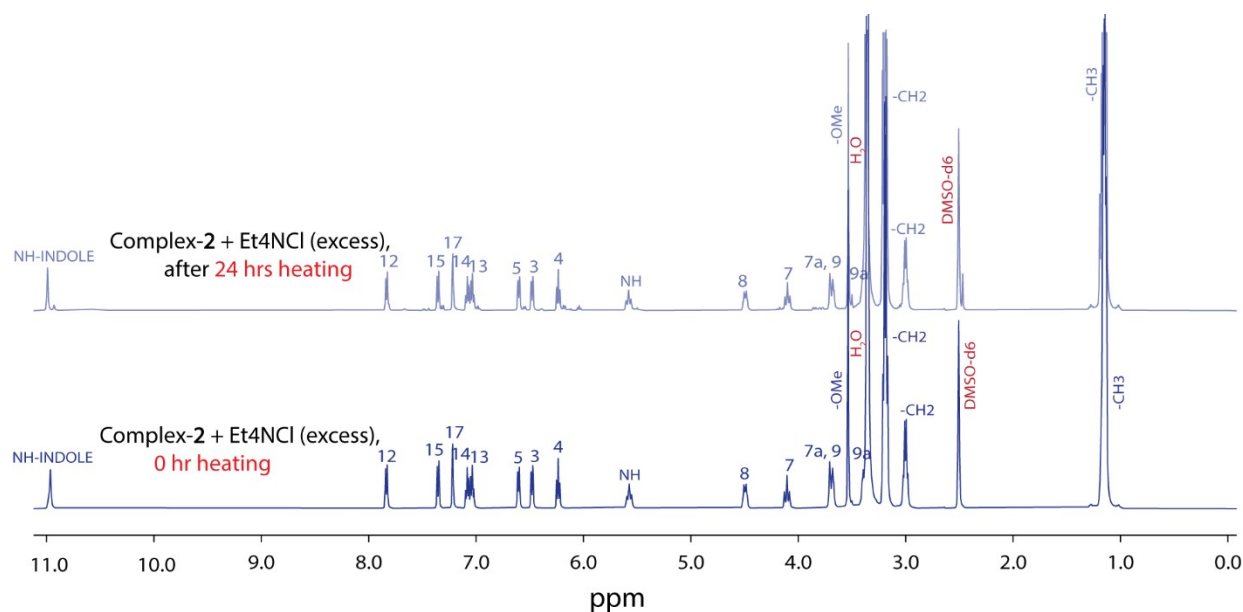

**Figure S13b.**  $^1\text{H}$  NMR spectra (**Full**) of **3** with excess  $\text{Et}_4\text{NCl}$  before and after heating at  $60^\circ\text{C}$  for 24 hrs. Spectra were recorded in  $d_6$ -DMSO using a 500 MHz NMR instrument.

## E. UV-visible and CD data

**Table S2.** Electronic spectroscopic data for complex **1-6** (In DMF).

| Complexes                | $\lambda_{\text{max}}/\text{nm}$ ( $\epsilon/\text{M}^{-1}\text{cm}^{-1}$ ) |
|--------------------------|-----------------------------------------------------------------------------|
| <b>Co(III)-complexes</b> |                                                                             |
| <b>1</b>                 | 690(96), 518(377) (sh), 390(2205)                                           |
| <b>2</b>                 | 680(280), 525(323) (sh), 378(3860)                                          |
| <b>3</b>                 | 690(103), 518(389) (sh), 390(2310)                                          |
| <b>Fe(III)-complexes</b> |                                                                             |
| <b>4</b>                 | 471(3110), 329(5397) (sh)                                                   |
| <b>5</b>                 | 475(3095), 332(4718) (sh)                                                   |

**Note:** UV-visible spectra of Co(III)-complexes **1**, **2**, and **3** in DMF are in the manuscript Figure 3.

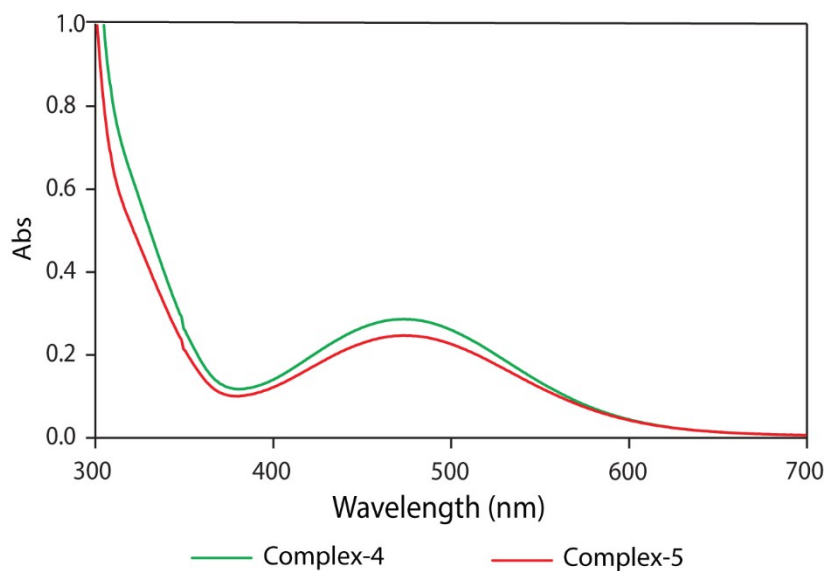

**Figure S14.** UV-visible spectra of Fe(III)-complexes (**4** and **5**) in DMF at a concentration of 0.1 mM.

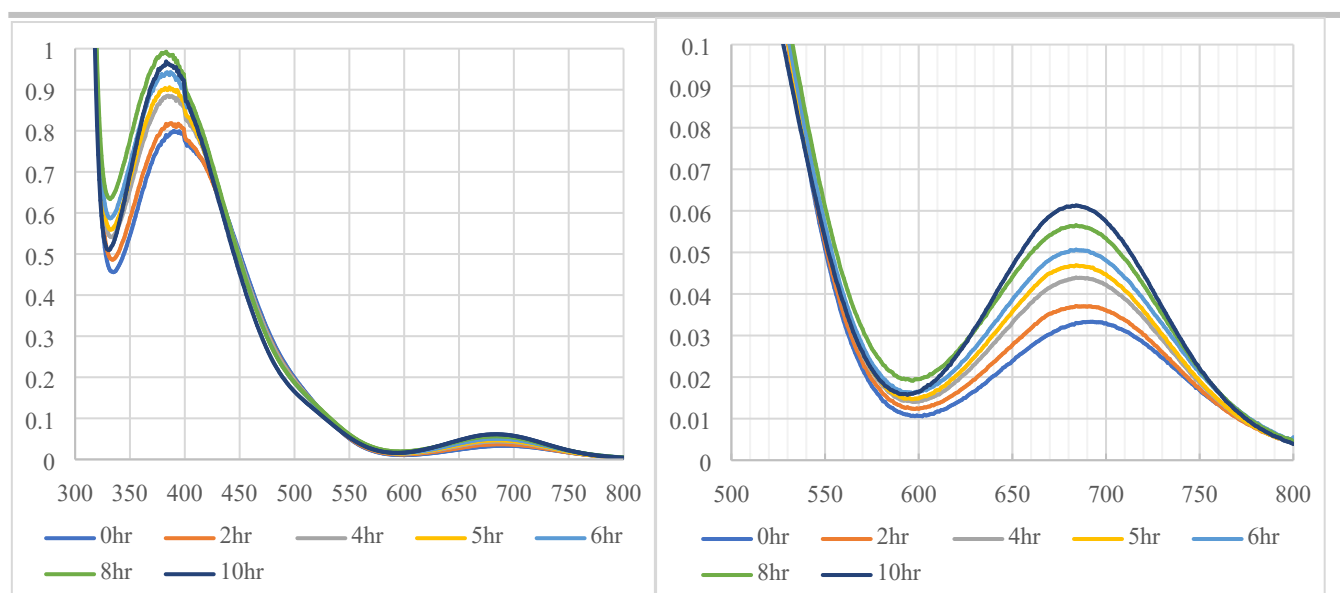

**Figure S14a.** Spectral change upon heating **3** at 60 °C in DMF.

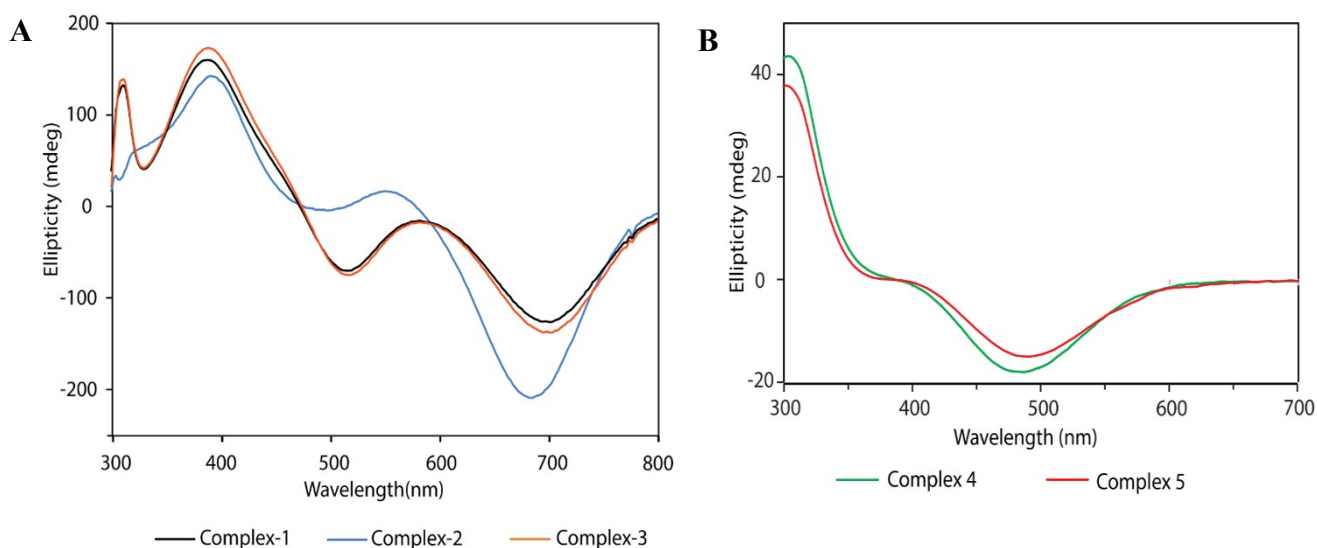

**Figure S15.** (A) CD spectra of Co(III) complexes (**1-3**), and (B) CD spectra of Fe(III) complexes (**4** and **5**) in DMF. Concentrations used: For **1-3**, 3 mM in DMF; For **4** and **5**, 1 mM in DMF. Path length used for all, 1mm.

## F. Single Crystal X-ray Structure data

| Complexes              | 1                                                                | 2                                                                | 4                                                                | 5                                                                  |
|------------------------|------------------------------------------------------------------|------------------------------------------------------------------|------------------------------------------------------------------|--------------------------------------------------------------------|
| Empirical Formula      | C <sub>46</sub> H <sub>60</sub> CoN <sub>5</sub> O <sub>10</sub> | C <sub>47</sub> H <sub>55</sub> CoN <sub>6</sub> O <sub>10</sub> | C <sub>46</sub> H <sub>56</sub> FeN <sub>5</sub> O <sub>10</sub> | C <sub>50</sub> H <sub>65</sub> ClFeN <sub>6</sub> O <sub>12</sub> |
| Formula Weight         | 901.92                                                           | 922.90                                                           | 894.80                                                           | 1033.38                                                            |
| Wavelength (Å)         | 0.71073                                                          | 0.71073                                                          | 0.71073                                                          | 0.71073                                                            |
| Crystal system         | tetragonal                                                       | orthorhombic                                                     | tetragonal                                                       | monoclinic                                                         |
| Space group            | <i>P4<sub>3</sub>2<sub>1</sub>2</i>                              | <i>P2<sub>1</sub>2<sub>1</sub>2<sub>1</sub></i>                  | <i>P4<sub>3</sub>2<sub>1</sub>2</i>                              | <i>P2<sub>1</sub></i>                                              |
| a, Å                   | 12.1822(4)                                                       | 37.955(11)                                                       | 12.1909(7)                                                       | 9.7580(10)                                                         |
| b, Å                   | 12.1822(4)                                                       | 9.606(3)                                                         | 12.1909(7)                                                       | 19.6919(19)                                                        |
| c, Å                   | 30.3583(16)                                                      | 13.538(4)                                                        | 30.773(3)                                                        | 27.323(3)                                                          |
| α, deg                 | 90                                                               | 90                                                               | 90                                                               | 90                                                                 |
| β, deg                 | 90                                                               | 90                                                               | 90                                                               | 93.402(3)                                                          |
| γ, deg                 | 90                                                               | 90                                                               | 90                                                               | 90                                                                 |
| Volume, Å <sup>3</sup> | 4505.4(4)                                                        | 4936(2)                                                          | 4573.4(6)                                                        | 5240.9(9)                                                          |
| Z/ρ                    | 4/1.330                                                          | 4/1.242                                                          | 4/1.300                                                          | 4/1.310                                                            |
| μ                      | 0.444                                                            | 0.407                                                            | 0.392                                                            | 0.404                                                              |
| Coll reflns            | 4427                                                             | 8693                                                             | 4039                                                             | 18351                                                              |
| Indep refln            | 3911                                                             | 5916                                                             | 3516                                                             | 11787                                                              |
| FLACK para.            | 0.010(5)                                                         | 0.099(6)                                                         | 0.009(6)                                                         | 0.124(7)                                                           |
| GOF                    | 1.121                                                            | 1.179                                                            | 1.147                                                            | 1.176                                                              |
| R1 <sup>a</sup>        | 0.0340                                                           | 0.0565                                                           | 0.0450                                                           | 0.0904                                                             |
| wR2 <sup>a</sup>       | 0.0876                                                           | 0.1358                                                           | 0.1176                                                           | 0.1350                                                             |
| R1 <sup>b</sup>        | 0.0434                                                           | 0.1076                                                           | 0.0570                                                           | 0.1530                                                             |
| wR2 <sup>b</sup>       | 0.0969                                                           | 0.1763                                                           | 0.1353                                                           | 0.1585                                                             |

**Table S3.** Crystallographic data and refinement parameters of **1**, **2**, **4**, and **5**.

---

<sup>a</sup>  $I > 2\sigma$ . <sup>b</sup> All data

**Crystallography.** The crystal of the complexes obtained during synthesis was used for X-ray analysis. The crystals were mounted on glass fibre. All geometric and intensity data were collected at room temperature using a Bruker SMART APEX CCD diffractometer equipped with a fine

---

focus 1.75 kW sealed tube Mo-K $\alpha$  ( $\lambda = 0.71073$  Å) X-ray source, with increasing  $\omega$  (width of  $0.3^\circ$  per frame) at a scan speed of either 3 or 5 s/frame. The SMART software was used for data acquisition and the SAINT software for data extraction. Absorption corrections were done using a multi-scan. The structure solution and refinement were performed on the WinGX environment using the SHELXS97 SHELXL97 programs. All non-hydrogen atoms were refined anisotropically. The hydrogen atoms were located from the Fourier maps and refined isotropically wherever possible. Thus, some C-H bonds will not be ideal and may vary. Some hydrogen atoms attached to the solvent molecules could not be located or fixed, so the molecular weight may not match. A perspective view of the complex was obtained by ORTEP. The structures were deposited to the CCDC with CCDC numbers of the structures 2351541-2351544 for **1**, **2**, **4**, and **5**, respectively.

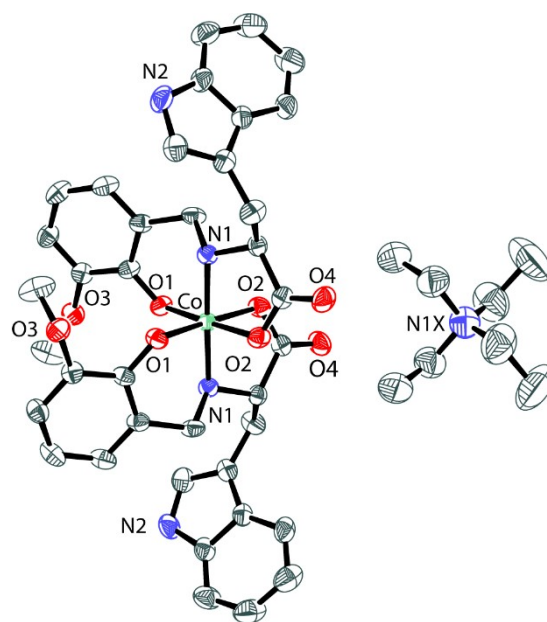

**Figure S16.** ORTEP figure 1 with 40 % ellipsoid probability.

**Table S4.** Bond lengths (Å) and angles (°) of complex 1.

|     |       |             |     |        |            |
|-----|-------|-------------|-----|--------|------------|
| Co1 | -O1   | 1.9088 (19) | C10 | -C17   | 1.364 (5)  |
| Co1 | -O2   | 1.910 (2)   | C11 | -C16   | 1.418 (5)  |
| Co1 | -N1   | 1.940 (3)   | C11 | -C12   | 1.394 (5)  |
| Co1 | -O1_a | 1.9088 (19) | C12 | -C13   | 1.375 (7)  |
| Co1 | -O2_a | 1.910 (2)   | C13 | -C14   | 1.384 (8)  |
| Co1 | -N1_a | 1.940 (3)   | C14 | -C15   | 1.372 (7)  |
| O1  | -C1   | 1.331 (3)   | C15 | -C16   | 1.389 (6)  |
| O2  | -C18  | 1.288 (4)   | N1X | -C2X_b | 1.501 (8)  |
| O3  | -C2   | 1.388 (4)   | N1X | -C2X   | 1.501 (8)  |
| O3  | -C19  | 1.402 (6)   | N1X | -C3X   | 1.523 (7)  |
| O4  | -C18  | 1.235 (4)   | N1X | -C3X_b | 1.523 (7)  |
| N1  | -C7   | 1.482 (4)   | N1  | -C8    | 1.483 (4)  |
| N2  | -C16  | 1.364 (5)   | N2  | -C17   | 1.360 (5)  |
| C1  | -C2   | 1.400 (5)   | C1  | -C6    | 1.407 (5)  |
| N1  | -H1   | 0.77 (4)    | C2  | -C3    | 1.378 (5)  |
| N2  | -H2   | 0.8600      | C3  | -C4    | 1.375 (5)  |
| C4  | -C5   | 1.380 (5)   | C5  | -C6    | 1.387 (5)  |
| C6  | -C7   | 1.495 (5)   | C8  | -C9    | 1.547 (4)  |
| C8  | -C18  | 1.529 (5)   | C9  | -C10   | 1.503 (5)  |
| C10 | -C11  | 1.426 (5)   | C1X | -C2X   | 1.579 (11) |
| C3X | -C4X  | 1.530 (9)   |     |        |            |

**Angles**

|      |      |       |            |     |     |     |           |
|------|------|-------|------------|-----|-----|-----|-----------|
| O1   | -Co1 | -O2   | 175.44 (9) | C16 | -N2 | -H2 | 126.00    |
| O1   | -Co1 | -N1   | 95.35 (10) | C17 | -N2 | -H2 | 126.00    |
| O1   | -Co1 | -O1_a | 96.16 (9)  | C1  | -C2 | -C3 | 121.4 (3) |
| O1   | -Co1 | -O2_a | 88.40 (9)  | O3  | -C2 | -C1 | 118.0 (3) |
| O1   | -Co1 | -N1_a | 85.65 (10) | O3  | -C2 | -C3 | 120.3 (3) |
| O2   | -Co1 | -N1   | 84.98 (10) | C2  | -C3 | -C4 | 120.6 (3) |
| O1_a | -Co1 | -O2   | 88.40 (9)  | C3  | -C4 | -C5 | 119.3 (3) |
| O2_a | -Co1 | -O2_a | 87.04 (9)  | C4  | -C5 | -C6 | 120.7 (3) |
| O2   | -Co1 | -N1_a | 93.94 (10) | C1  | -C6 | -C7 | 117.8 (3) |

|      |      |       |             |     |      |      |           |
|------|------|-------|-------------|-----|------|------|-----------|
| O1_a | -Co1 | -N1   | 85.65 (10)  | C5  | -C6  | -C7  | 121.6 (3) |
| O2_a | -Co1 | -N1   | 93.94 (10)  | C1  | -C6  | -C5  | 120.6 (3) |
| N1   | -Co1 | -N1_a | 178.51 (10) | N1  | -C7  | -C6  | 109.9 (3) |
| O1_a | -Co1 | -O2_a | 175.44 (9)  | N1  | -C8  | -C9  | 112.5 (3) |
| O1_a | -Co1 | -N1_a | 95.35 (10)  | N1  | -C8  | -C18 | 108.8 (2) |
| O2_a | -Co1 | -N1_a | 84.98 (10)  | C9  | -C8  | -C18 | 110.2 (3) |
| Co1  | -O1  | -C1   | 121.08 (16) | C8  | -C9  | -C10 | 115.4 (3) |
| Co1  | -O2  | -C18  | 114.1 (2)   | C9  | -C10 | -C17 | 127.3 (3) |
| C2   | -O3  | -C19  | 115.3 (3)   | C9  | -C10 | -C11 | 127.2 (3) |
| Co1  | -N1  | -C7   | 112.4 (2)   | C11 | -C10 | -C17 | 105.5 (3) |
| Co1  | -N1  | -C8   | 109.18 (19) | C10 | -C11 | -C12 | 134.7 (3) |
| C7   | -N1  | -C8   | 114.2 (2)   | C10 | -C11 | -C16 | 107.3 (3) |
| C16  | -N2  | -C17  | 108.7 (3)   | C12 | -C11 | -C16 | 118.0 (3) |
| O1   | -C1  | -C2   | 120.5 (3)   | C11 | -C12 | -C13 | 119.6 (4) |
| O1   | -C1  | -C6   | 122.3 (3)   | C12 | -C13 | -C14 | 120.8 (4) |
| C2   | -C1  | -C6   | 117.2 (3)   | C13 | -C14 | -C15 | 122.2 (5) |
| Co1  | -N1  | -H1   | 103 (3)     | C14 | -C15 | -C16 | 116.8 (4) |
| C7   | -N1  | -H1   | 110 (3)     | N2  | -C16 | -C15 | 130.2 (4) |
| C8   | -N1  | -H1   | 107 (3)     | C11 | -C16 | -C15 | 122.6 (4) |

**Table S5** Non-covalent interactions in Complex **1**.

| Atoms         | D-H (Å)  | H...A (Å) | D...A (Å) | DHA (°) |
|---------------|----------|-----------|-----------|---------|
| O1X-H1XD...O4 | 0.85     | 2.07      | 2.897 (5) | 163     |
| N2-H2...O1    | 0.86     | 2.38      | 3.198 (4) | 160     |
| N2-H2...O2    | 0.86     | 2.52      | 3.113 (4) | 127     |
| O1X-H1HE...O1 | 0.85     | 2.57      | 3.233 (6) | 136     |
| O1X-H1XE...O3 | 0.85     | 2.16      | 2.926 (6) | 151     |
| N1-H1...O1    | 0.77 (4) | 2.28 (4)  | 2.616 (3) | 107     |
| C13-H13...O3  | 0.93     | 2.37      | 3.303 (5) | 176     |
| C19-H19B...O4 | 0.96     | 2.59      | 3.475 (5) | 154     |



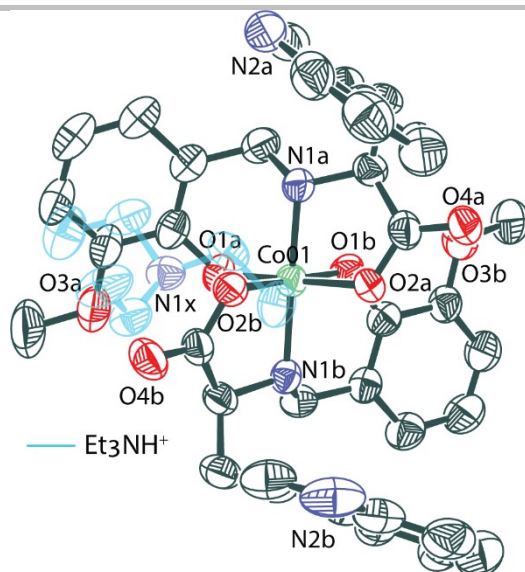

**Figure S17.** ORTEP figure of **2** with 40 % ellipsoid probability.

**Table S6.** Bond lengths (Å) and angles (°) of complex **2**.

|      |       |            |      |       |            |
|------|-------|------------|------|-------|------------|
| Co01 | -O1A  | 1.908 (5)  | C1B  | -C2B  | 1.427 (11) |
| Co01 | -O1B  | 1.879 (4)  | N1B  | -H1B  | 0.9800     |
| Co01 | -O2A  | 1.905 (5)  | C2A  | -C3A  | 1.392 (13) |
| Co01 | -O2B  | 1.902 (4)  | N2A  | -H2A  | 0.8600     |
| Co01 | -N1A  | 1.930 (5)  | N2B  | -H2B  | 0.8600     |
| Co01 | -N1B  | 1.926 (5)  | C2B  | -C3B  | 1.370 (13) |
| O1A  | -C1A  | 1.334 (8)  | C3A  | -C4A  | 1.396 (16) |
| O1B  | -C1B  | 1.322 (8)  | C3B  | -C4B  | 1.371 (16) |
| O2A  | -C18A | 1.289 (9)  | C4A  | -C5A  | 1.360 (15) |
| O2B  | -C18B | 1.292 (9)  | C4B  | -C5B  | 1.396 (13) |
| O3A  | -C2A  | 1.348 (13) | C5A  | -C6A  | 1.397 (12) |
| O3A  | -C19A | 1.395 (14) | C5B  | -C6B  | 1.378 (11) |
| O3B  | -C2B  | 1.373 (10) | C6A  | -C7A  | 1.501 (10) |
| O3B  | -C19B | 1.396 (10) | C6B  | -C7B  | 1.478 (11) |
| O4A  | -C18A | 1.245 (10) | C8A  | -C9A  | 1.547 (9)  |
| O4B  | -C18B | 1.234 (9)  | C8A  | -C18A | 1.522 (12) |
| N1A  | -C7A  | 1.475 (10) | C8B  | -C9B  | 1.541 (12) |
| N1A  | -C8A  | 1.468 (9)  | C8B  | -C18B | 1.502 (10) |
| N1B  | -C7B  | 1.491 (9)  | C9A  | -C10A | 1.521 (11) |
| N1B  | -C8B  | 1.487 (9)  | C9B  | -C10B | 1.510 (13) |
| N2A  | -C16A | 1.389 (13) | C10A | -C11A | 1.435 (12) |
| N2A  | -C17A | 1.363 (12) | C10A | -C17A | 1.367 (11) |
| N2B  | -C16B | 1.358 (17) | C10B | -C17B | 1.368 (14) |
| N2B  | -C17B | 1.365 (16) | C10B | -C11B | 1.422 (14) |
| C1A  | -C2A  | 1.399 (11) | C11A | -C16A | 1.415 (11) |
| C1A  | -C6A  | 1.403 (11) | C11A | -C12A | 1.391 (13) |
| N1A  | -H1A  | 0.9800     | C11B | -C16B | 1.407 (12) |
| C1B  | -C6B  | 1.420 (10) | C11B | -C12B | 1.385 (13) |
| C12A | -C13A | 1.373 (15) | C12B | -C13B | 1.361 (15) |
| C13A | -C14A | 1.415 (14) | C13B | -C14B | 1.38 (2)   |
| C14A | -C15A | 1.344 (16) | C14B | -C15B | 1.35 (2)   |
| C15A | -C16A | 1.388 (15) | C15B | -C16B | 1.38 (2)   |
| N1X  | -C5X  | 1.512 (13) | C17B | -H17B | 0.9300     |
| N1X  | -C1X  | 1.477 (13) | C19A | -H19F | 0.9600     |
| N1X  | -C3X  | 1.507 (12) | C19A | -H19D | 0.9600     |

|      |       |        |      |       |            |
|------|-------|--------|------|-------|------------|
| C3A  | -H3A  | 0.9300 | C19A | -H19E | 0.9600     |
| C3B  | -H3B  | 0.9300 | C19B | -H19A | 0.9600     |
| C4A  | -H4A  | 0.9300 | C19B | -H19B | 0.9600     |
| C4B  | -H4B  | 0.9300 | C19B | -H19C | 0.9600     |
| C5A  | -H5A  | 0.9300 | C1X  | -C2X  | 1.510 (16) |
| C5B  | -H5B  | 0.9300 | O1X  | -C50  | 1.34 (4)   |
| C7A  | -H7AA | 0.9700 | N1X  | -H1X  | 0.9800     |
| C7A  | -H7AB | 0.9700 | C3X  | -C4X  | 1.502 (18) |
| C7B  | -H7BA | 0.9700 | C5X  | -C6X  | 1.471 (18) |
| C7B  | -H7BB | 0.9700 | O51  | -C50  | 1.33 (5)   |
| C8A  | -H8A  | 0.9800 | C1X  | -H1XB | 0.9700     |
| C8B  | -H8B  | 0.9800 | C1X  | -H1XA | 0.9700     |
| C9A  | -H9AB | 0.9700 | C2X  | -H2XB | 0.9600     |
| C9A  | -H9AA | 0.9700 | C2X  | -H2XC | 0.9600     |
| C9B  | -H9BA | 0.9700 | C2X  | -H2XA | 0.9600     |
| C9B  | -H9BB | 0.9700 | C3X  | -H3XA | 0.9700     |
| C12A | -H12A | 0.9300 | C3X  | -H3XB | 0.9700     |
| C4X  | -H4XA | 0.9600 | C6X  | -H6XB | 0.9600     |
| C4X  | -H4XC | 0.9600 | N2X  | -C7X  | 1.11 (2)   |
| C4X  | -H4XB | 0.9600 | C7X  | -C8X  | 1.437 (19) |
| C5X  | -H5XB | 0.9700 | C8X  | -H8XA | 0.9600     |
| C5X  | -H5XA | 0.9700 | C8X  | -H8XB | 0.9600     |
| C6X  | -H6XC | 0.9600 | C8X  | -H8XC | 0.9600     |
| C6X  | -H6XA | 0.9600 |      |       |            |

|       |      |        |           |      |      |       |           |
|-------|------|--------|-----------|------|------|-------|-----------|
| N2    | -C16 | -C11   | 107.3 (3) | C10  | -C9  | -H9A  | 108.00    |
| N2    | -C17 | -C10   | 111.2 (3) | C10  | -C9  | -H9B  | 108.00    |
| O2    | -C18 | -C8    | 116.7 (3) | C11  | -C12 | -H12  | 120.00    |
| O4    | -C18 | -C8    | 119.2 (3) | C13  | -C12 | -H12  | 120.00    |
| O2    | -C18 | -O4    | 124.1 (3) | C12  | -C13 | -H13  | 120.00    |
| C2X_b | -N1X | -C3X   | 110.8 (5) | C14  | -C13 | -H13  | 120.00    |
| C3X_b | -N1X | -C3X_b | 109.2 (4) | C15  | -C14 | -H14  | 119.00    |
| C2X_b | -N1X | -C3X_b | 105.1 (3) | C13  | -C14 | -H14  | 119.00    |
| C2X   | -N1X | -C3X_b | 110.8 (5) | C14  | -C15 | -H15  | 122.00    |
| C2X   | -N1X | -C3X   | 105.1 (3) | C16  | -C15 | -H15  | 122.00    |
| C2X   | -N1X | -C2X_b | 115.9 (5) | N2   | -C17 | -H17  | 124.00    |
| C2    | -C3  | -H3    | 120.00    | C10  | -C17 | -H17  | 124.00    |
| C4    | -C3  | -H3    | 120.00    | H19B | -C19 | -H19C | 110.00    |
| C5    | -C4  | -H4    | 120.00    | O3   | -C19 | -H19A | 109.00    |
| C3    | -C4  | -H4    | 120.00    | O3   | -C19 | -H19B | 109.00    |
| C4    | -C5  | -H5    | 120.00    | O3   | -C19 | -H19C | 109.00    |
| C6    | -C5  | -H5    | 120.00    | H19A | -C19 | -H19B | 109.00    |
| N1    | -C7  | -H7A   | 110.00    | H19A | -C19 | -H19C | 109.00    |
| H7A   | -C7  | -H7B   | 108.00    | N1X  | -C2X | -C1X  | 112.5 (5) |
| C6    | -C7  | -H7B   | 110.00    | N1X  | -C3X | -C4X  | 114.4 (5) |
| N1    | -C7  | -H7B   | 110.00    | C2X  | -C1X | -H1XA | 110.00    |
| C6    | -C7  | -H7A   | 110.00    | C2X  | -C1X | -H1XB | 109.00    |
| C9    | -C8  | -H8    | 108.00    | C2X  | -C1X | -H1XC | 109.00    |
| N1    | -C8  | -H8    | 108.00    | H1XA | -C1X | -H1XB | 109.00    |
| C18   | -C8  | -H8    | 108.00    | H1XA | -C1X | -H1XC | 109.00    |
| C8    | -C9  | -H9B   | 108.00    | H1XB | -C1X | -H1XC | 109.00    |
| C8    | -C9  | -H9A   | 108.00    | H1XD | -O1X | -H1XE | 105.00    |
| H9A   | -C9  | -H9B   | 107.00    | N1X  | -C2X | -H2XA | 109.00    |
| C1X   | -C2X | -H2XA  | 109.00    | H3XA | -C3X | -H3XB | 108.00    |
| C1X   | -C2X | -H2XB  | 109.00    | C3X  | -C4X | -H4XB | 109.00    |
| H2XA  | -C2X | -H2XB  | 108.00    | C3X  | -C4X | -H4XC | 109.00    |
| N1X   | -C2X | -H2XB  | 109.00    | C3X  | -C4X | -H4XA | 109.00    |
| N1X   | -C3X | -H3XA  | 109.00    | H4XA | -C4X | -H4XC | 110.00    |
| C4X   | -C3X | -H3XA  | 109.00    | H4XB | -C4X | -H4XC | 109.00    |
| C4X   | -C3X | -H3XB  | 109.00    | H4XA | -C4X | -H4XB | 110.00    |
| N1X   | -C3X | -H3XB  | 109.00    |      |      |       |           |

**Table S7.** Non-covalent interactions in Complex **2**

| Atoms           | D-H (Å) | H...A (Å) | D...A (Å)  | DHA (°) |
|-----------------|---------|-----------|------------|---------|
| N1X-H1X...O2B   | 0.98    | 2.51      | 3.266 (8)  | 133     |
| N1X-H1X...O4B   | 0.98    | 1.76      | 2.720 (9)  | 167     |
| N2A-H2A...O4A   | 0.86    | 2.07      | 2.885 (9)  | 158     |
| N2B-H2B...O1A   | 0.86    | 2.24      | 3.074 (10) | 163     |
| C8A-H8A...O1B   | 0.98    | 2.51      | 2.870 (8)  | 102     |
| C2X-H2XC...O2B  | 0.96    | 2.60      | 3.328 (12) | 133     |
| C12A-H12A...O4A | 0.93    | 2.52      | 3.307 (10) | 142     |

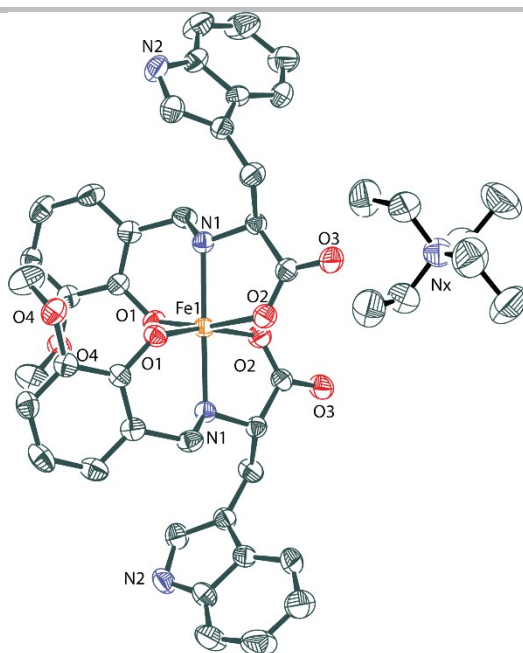

**Figure S18.** ORTEP figure of **4** with 40% ellipsoid probability.

**Table S8.** Bond lengths (Å) and angles (°) of complex **4**.

|     |       |            |     |        |            |
|-----|-------|------------|-----|--------|------------|
| Fe1 | -O1   | 1.943 (3)  | C10 | -C17   | 1.363 (7)  |
| Fe1 | -O2   | 2.020 (4)  | C11 | -C16   | 1.418 (7)  |
| Fe1 | -N1   | 2.160 (4)  | C11 | -C12   | 1.391 (8)  |
| Fe1 | -O1_a | 1.943 (3)  | C12 | -C13   | 1.372 (9)  |
| Fe1 | -O2_a | 2.020 (4)  | C13 | -C14   | 1.401 (11) |
| Fe1 | -N1_a | 2.160 (4)  | C14 | -C15   | 1.372 (10) |
| O1  | -C1   | 1.335 (4)  | C15 | -C16   | 1.393 (8)  |
| O2  | -C18  | 1.278 (6)  | N1X | -C21_b | 1.528 (11) |
| O3  | -C2   | 1.389 (6)  | N1X | -C21   | 1.527 (11) |
| O3  | -C19  | 1.419 (7)  | N1X | -C22   | 1.471 (13) |
| O4  | -C18  | 1.238 (6)  | N1X | -C22_b | 1.470 (13) |
| N1  | -C7   | 1.486 (6)  | C3  | -H3    | 0.9300     |
| N1  | -C8   | 1.485 (6)  | C4  | -H4    | 0.9300     |
| N2  | -C16  | 1.364 (7)  | C5  | -H5    | 0.9300     |
| N2  | -C17  | 1.357 (7)  | C7  | -H7B   | 0.9700     |
| C1  | -C2   | 1.400 (6)  | C7  | -H7A   | 0.9700     |
| C1  | -C6   | 1.407 (6)  | C8  | -H8    | 0.9800     |
| N1  | -H1   | 0.77 (5)   | C9  | -H9B   | 0.9700     |
| C2  | -C3   | 1.374 (7)  | C9  | -H9A   | 0.9700     |
| N2  | -H2   | 0.91 (5)   | C12 | -H12   | 0.9300     |
| C3  | -C4   | 1.379 (7)  | C13 | -H13   | 0.9300     |
| C4  | -C5   | 1.376 (8)  | C14 | -H14   | 0.9300     |
| C5  | -C6   | 1.388 (7)  | C15 | -H15   | 0.9300     |
| C6  | -C7   | 1.502 (7)  | C17 | -H17   | 0.9300     |
| C8  | -C9   | 1.543 (6)  | C19 | -H19B  | 0.9600     |
| C8  | -C18  | 1.533 (7)  | C19 | -H19C  | 0.9600     |
| C9  | -C10  | 1.497 (7)  | C19 | -H19A  | 0.9600     |
| C10 | -C11  | 1.423 (7)  | C20 | -C21   | 1.547 (14) |
| C22 | -C23  | 1.615 (19) | C22 | -H22A  | 0.9700     |
| C20 | -H20A | 0.9600     | C22 | -H22B  | 0.9700     |
| C20 | -H20B | 0.9600     | C23 | -H23A  | 0.9600     |
| C20 | -H20C | 0.9600     | C23 | -H23B  | 0.9600     |
| C21 | -H21A | 0.9700     | C23 | -H23C  | 0.9600     |
| C21 | -H21B | 0.9700     |     |        |            |

## Angles

|       |      |        |             |      |      |       |           |
|-------|------|--------|-------------|------|------|-------|-----------|
| O1    | -Fe1 | -O2    | 165.08 (15) | C16  | -N2  | -H2   | 124 (3)   |
| O1    | -Fe1 | -N1    | 89.59 (13)  | C17  | -N2  | -H2   | 127 (3)   |
| O1    | -Fe1 | -O1_a  | 100.55 (15) | C1   | -C2  | -C3   | 121.9 (4) |
| O1    | -Fe1 | -O2_a  | 88.20 (14)  | O3   | -C2  | -C1   | 117.5 (4) |
| O1    | -Fe1 | -N1_a  | 90.84 (13)  | O3   | -C2  | -C3   | 120.4 (4) |
| O2    | -Fe1 | -N1    | 78.12 (14)  | C2   | -C3  | -C4   | 119.4 (5) |
| O1_a  | -Fe1 | -O2    | 88.20 (14)  | C3   | -C4  | -C5   | 120.3 (5) |
| O2    | -Fe1 | -O2_a  | 85.99 (14)  | C4   | -C5  | -C6   | 120.9 (5) |
| O2    | -Fe1 | -N1_a  | 101.37 (14) | C1   | -C6  | -C7   | 117.8 (4) |
| O1_a  | -Fe1 | -N1    | 90.84 (13)  | C5   | -C6  | -C7   | 122.5 (4) |
| O2_a  | -Fe1 | -N1    | 101.37 (14) | C1   | -C6  | -C5   | 119.6 (4) |
| N1    | -Fe1 | -N1_a  | 179.32 (14) | N1   | -C7  | -C6   | 110.8 (4) |
| O1_a  | -Fe1 | -O2_a  | 165.08 (15) | N1   | -C8  | -C9   | 112.7 (4) |
| O1_a  | -Fe1 | -N1_a  | 89.59 (13)  | N1   | -C8  | -C18  | 110.0 (3) |
| O2_a  | -Fe1 | -N1_a  | 78.12 (14)  | C9   | -C8  | -C18  | 109.9 (4) |
| Fe1   | -O1  | -C1    | 125.2 (2)   | C8   | -C9  | -C10  | 115.0 (4) |
| Fe1   | -O2  | -C18   | 118.9 (3)   | C9   | -C10 | -C17  | 127.5 (5) |
| C2    | -O3  | -C19   | 115.2 (4)   | C9   | -C10 | -C11  | 126.9 (5) |
| Fe1   | -N1  | -C7    | 111.4 (3)   | C11  | -C10 | -C17  | 105.6 (4) |
| Fe1   | -N1  | -C8    | 109.7 (3)   | C10  | -C11 | -C12  | 133.9 (5) |
| C7    | -N1  | -C8    | 114.8 (3)   | C10  | -C11 | -C16  | 107.0 (4) |
| C16   | -N2  | -C17   | 108.1 (4)   | C12  | -C11 | -C16  | 119.1 (5) |
| O1    | -C1  | -C2    | 120.7 (4)   | C11  | -C12 | -C13  | 119.5 (6) |
| O1    | -C1  | -C6    | 121.5 (4)   | C12  | -C13 | -C14  | 120.8 (6) |
| C2    | -C1  | -C6    | 117.9 (4)   | C13  | -C14 | -C15  | 121.3 (7) |
| Fe1   | -N1  | -H1    | 104 (3)     | C14  | -C15 | -C16  | 118.1 (6) |
| C7    | -N1  | -H1    | 109 (4)     | N2   | -C16 | -C15  | 131.1 (5) |
| C8    | -N1  | -H1    | 108 (4)     | C11  | -C16 | -C15  | 121.2 (5) |
| N2    | -C16 | -C11   | 107.7 (4)   | C10  | -C9  | -H9A  | 109.00    |
| N2    | -C17 | -C10   | 111.6 (4)   | C10  | -C9  | -H9B  | 109.00    |
| O2    | -C18 | -C8    | 117.0 (4)   | C11  | -C12 | -H12  | 120.00    |
| O4    | -C18 | -C8    | 118.5 (4)   | C13  | -C12 | -H12  | 120.00    |
| O2    | -C18 | -O4    | 124.5 (5)   | C12  | -C13 | -H13  | 120.00    |
| C21_b | -N1X | -C22   | 111.2 (8)   | C14  | -C13 | -H13  | 120.00    |
| C22_b | -N1X | -C22_b | 118.0 (9)   | C15  | -C14 | -H14  | 119.00    |
| C21_b | -N1X | -C22_b | 104.2 (6)   | C13  | -C14 | -H14  | 119.00    |
| C21_b | -N1X | -C22_b | 111.3 (8)   | C14  | -C15 | -H15  | 121.00    |
| C21   | -N1X | -C22   | 104.2 (6)   | C16  | -C15 | -H15  | 121.00    |
| C21   | -N1X | -C21_b | 107.6 (7)   | N2   | -C17 | -H17  | 124.00    |
| C2    | -C3  | -H3    | 120.00      | C10  | -C17 | -H17  | 124.00    |
| C4    | -C3  | -H3    | 120.00      | H19B | -C19 | -H19C | 109.00    |
| C5    | -C4  | -H4    | 120.00      | O3   | -C19 | -H19A | 109.00    |
| C3    | -C4  | -H4    | 120.00      | O3   | -C19 | -H19B | 109.00    |
| C4    | -C5  | -H5    | 119.00      | O3   | -C19 | -H19C | 109.00    |
| C6    | -C5  | -H5    | 120.00      | H19A | -C19 | -H19B | 109.00    |
| N1    | -C7  | -H7A   | 109.00      | H19A | -C19 | -H19C | 110.00    |
| H7A   | -C7  | -H7B   | 108.00      | N1X  | -C21 | -C20  | 112.8 (7) |
| C6    | -C7  | -H7B   | 109.00      | N1X  | -C22 | -C23  | 109.2 (9) |
| N1    | -C7  | -H7B   | 109.00      | C21  | -C20 | -H20A | 109.00    |
| C6    | -C7  | -H7A   | 109.00      | C21  | -C20 | -H20B | 110.00    |
| C9    | -C8  | -H8    | 108.00      | C21  | -C20 | -H20C | 109.00    |
| N1    | -C8  | -H8    | 108.00      | H20A | -C20 | -H20B | 109.00    |
| C18   | -C8  | -H8    | 108.00      | H20A | -C20 | -H20C | 109.00    |
| C8    | -C9  | -H9B   | 109.00      | H20B | -C20 | -H20C | 110.00    |
| C8    | -C9  | -H9A   | 108.00      | N1X  | -C21 | -H21A | 109.00    |
| H9A   | -C9  | -H9B   | 107.00      | N1X  | -C21 | -H21B | 109.00    |
| C20   | -C21 | -H21A  | 109.00      | H22A | -C22 | -H22B | 108.00    |
| C20   | -C21 | -H21B  | 109.00      | C22  | -C23 | -H23A | 109.00    |
| H21A  | -C21 | -H21B  | 108.00      | C22  | -C23 | -H23B | 109.00    |

|     |      |       |        |      |      |       |        |
|-----|------|-------|--------|------|------|-------|--------|
| N1X | -C22 | -H22A | 110.00 | C22  | -C23 | -H23C | 109.00 |
| N1X | -C22 | -H22B | 110.00 | H23A | -C23 | -H23B | 110.00 |
| C23 | -C22 | -H22A | 110.00 | H23A | -C23 | -H23C | 110.00 |
| C23 | -C22 | -H22B | 110.00 | H23B | -C23 | -H23C | 109.00 |

**Table S9.** Non-covalent interactions in Complex **4**.

| Atoms        | D-H (Å)  | H...A (Å) | D...A (Å) | DHA (°) |
|--------------|----------|-----------|-----------|---------|
| N2-H2...O1   | 0.91 (5) | 2.10 (5)  | 2.998 (6) | 167 (4) |
| C1-H1B...O3  | 0.96     | 2.58      | 3.449 (7) | 150     |
| C17-H17...O4 | 0.93     | 2.37      | 3.294 (7) | 171     |

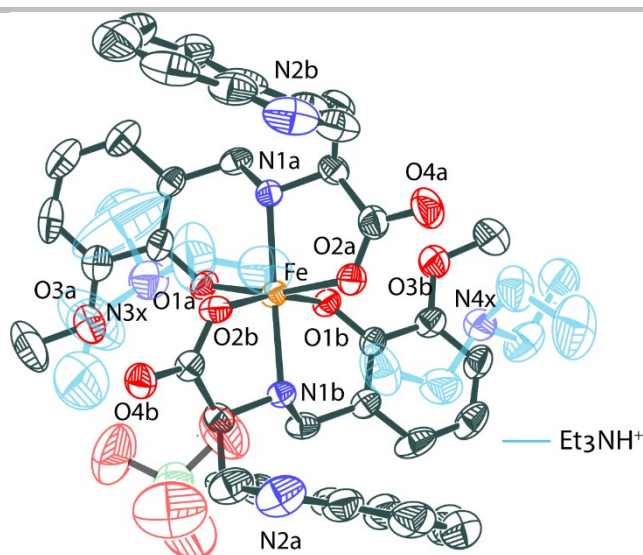

**Figure S19.** ORTEP figure of **5** with 40% ellipsoid probability.

**Table S10.** Bond lengths (Å) and angles (°) of complex **5**.

|      |       |            |     |       |            |
|------|-------|------------|-----|-------|------------|
| Fe1  | -O1A  | 1.902 (6)  | N2B | -C17B | 1.364 (18) |
| Fe1  | -O1B  | 1.937 (7)  | N2B | -C16B | 1.353 (18) |
| Fe1  | -O2A  | 2.048 (7)  | C1A | -C6A  | 1.388 (16) |
| Fe1  | -O2B  | 2.054 (7)  | C1A | -C2A  | 1.436 (17) |
| Fe1  | -N1A  | 2.170 (8)  | N1A | -H1A  | 0.9800     |
| Fe1  | -N1B  | 2.157 (8)  | C1B | -C6B  | 1.393 (14) |
| Fe2  | -N1E  | 2.154 (8)  | C1B | -C2B  | 1.403 (15) |
| Fe2  | -N1F  | 2.170 (8)  | N1B | -H1B  | 0.9800     |
| Fe2  | -O1E  | 1.936 (7)  | O1E | -C1E  | 1.342 (12) |
| Fe2  | -O1F  | 1.891 (6)  | O1F | -C1F  | 1.329 (12) |
| Fe2  | -O2E  | 2.066 (7)  | C2A | -C3A  | 1.380 (17) |
| Fe2  | -O2F  | 2.037 (6)  | N2A | -H2A  | 0.8600     |
| O1A  | -C1A  | 1.313 (12) | N2B | -H2B  | 0.8600     |
| O1B  | -C1B  | 1.327 (12) | C2B | -C3B  | 1.378 (15) |
| O2A  | -C18A | 1.268 (16) | O2E | -C18E | 1.268 (16) |
| O2B  | -C18B | 1.279 (14) | O2F | -C18F | 1.273 (14) |
| O3A  | -C2A  | 1.363 (16) | C3A | -C4A  | 1.37 (2)   |
| O3A  | -C19A | 1.41 (2)   | C3B | -C4B  | 1.33 (2)   |
| O3B  | -C19B | 1.388 (16) | O3E | -C2E  | 1.381 (14) |
| O3B  | -C2B  | 1.384 (14) | O3E | -C19E | 1.419 (17) |
| O4A  | -C18A | 1.233 (16) | O3F | -C19F | 1.32 (2)   |
| O4B  | -C18B | 1.238 (14) | O3F | -C2F  | 1.368 (17) |
| N1A  | -C8A  | 1.466 (13) | C4A | -C5A  | 1.36 (2)   |
| N1A  | -C7A  | 1.480 (13) | C4B | -C5B  | 1.37 (2)   |
| N1B  | -C8B  | 1.496 (13) | O4E | -C18E | 1.251 (15) |
| N1B  | -C7B  | 1.491 (12) | O4F | -C18F | 1.228 (14) |
| N2A  | -C16A | 1.34 (3)   | C5A | -C6A  | 1.410 (15) |
| N2A  | -C17A | 1.36 (2)   | C5B | -C6B  | 1.388 (15) |
| C6A  | -C7A  | 1.481 (15) | N1E | -C8E  | 1.490 (13) |
| C6B  | -C7B  | 1.504 (15) | N1E | -C7E  | 1.486 (14) |
| C8A  | -C18A | 1.513 (16) | N1F | -C7F  | 1.480 (12) |
| C8A  | -C9A  | 1.529 (16) | N1F | -C8F  | 1.479 (12) |
| C8B  | -C9B  | 1.528 (15) | N2E | -C17E | 1.371 (19) |
| C8B  | -C18B | 1.511 (15) | N2E | -C16E | 1.37 (2)   |
| C9A  | -C10A | 1.472 (18) | N2F | -C16F | 1.345 (19) |
| C9B  | -C10B | 1.481 (16) | N2F | -C17F | 1.342 (19) |
| C10A | -C17A | 1.37 (2)   | C3A | -H3A  | 0.9300     |
| C10A | -C11A | 1.41 (2)   | C3B | -H3B  | 0.9300     |

|      |       |            |      |       |            |
|------|-------|------------|------|-------|------------|
| C10B | -C11B | 1.420 (16) | C4A  | -H4A  | 0.9300     |
| C10B | -C17B | 1.362 (18) | C4B  | -H4B  | 0.9300     |
| C11A | -C12A | 1.41 (2)   | C5A  | -H5A  | 0.9300     |
| C11A | -C16A | 1.434 (19) | C5B  | -H5B  | 0.9300     |
| C11B | -C16B | 1.41 (2)   | C7A  | -H7AB | 0.9700     |
| C11B | -C12B | 1.387 (19) | C7A  | -H7AA | 0.9700     |
| C12A | -C13A | 1.36 (2)   | C7B  | -H7BA | 0.9700     |
| C12B | -C13B | 1.38 (2)   | C7B  | -H7BB | 0.9700     |
| C13A | -C14A | 1.43 (3)   | C8A  | -H8A  | 0.9800     |
| C13B | -C14B | 1.37 (3)   | C8B  | -H8B  | 0.9800     |
| C14A | -C15A | 1.37 (3)   | C9A  | -H9AA | 0.9700     |
| C14B | -C15B | 1.35 (2)   | C9A  | -H9AB | 0.9700     |
| C15A | -C16A | 1.37 (3)   | C9B  | -H9BA | 0.9700     |
| C15B | -C16B | 1.42 (2)   | C9B  | -H9BB | 0.9700     |
| C11  | -O3X  | 1.344 (16) | C12A | -H12A | 0.9300     |
| C11  | -O1X  | 1.432 (14) | C12B | -H12B | 0.9300     |
| C11  | -O2X  | 1.371 (16) | C13A | -H13A | 0.9300     |
| C11  | -O4X  | 1.351 (15) | C13B | -H13B | 0.9300     |
| C14A | -H14A | 0.9300     | C6E  | -C7E  | 1.487 (16) |
| C14B | -H14B | 0.9300     | C6F  | -C7F  | 1.478 (13) |
| C15A | -H15A | 0.9300     | C8E  | -C18E | 1.547 (16) |
| C15B | -H15B | 0.9300     | C8E  | -C9E  | 1.545 (14) |
| C17A | -H17A | 0.9300     | C8F  | -C18F | 1.530 (14) |
| C17B | -H17B | 0.9300     | C8F  | -C9F  | 1.539 (15) |
| C19A | -H19F | 0.9600     | C9E  | -C10E | 1.489 (17) |
| C19A | -H19D | 0.9600     | C9F  | -C10F | 1.494 (16) |
| C19A | -H19E | 0.9600     | C10E | -C11E | 1.422 (18) |
| C19B | -H19A | 0.9600     | C10E | -C17E | 1.38 (2)   |
| C19B | -H19B | 0.9600     | C10F | -C17F | 1.364 (19) |
| C19B | -H19C | 0.9600     | C10F | -C11F | 1.418 (15) |
| C1E  | -C6E  | 1.398 (15) | C11E | -C12E | 1.42 (2)   |
| C1E  | -C2E  | 1.389 (15) | C11E | -C16E | 1.40 (2)   |
| N1E  | -H1E  | 0.9800     | C11F | -C12F | 1.380 (15) |
| N1F  | -H1F  | 0.9800     | C11F | -C16F | 1.417 (16) |
| C1F  | -C2F  | 1.381 (17) | C12E | -C13E | 1.37 (2)   |
| C1F  | -C6F  | 1.415 (16) | C12F | -C13F | 1.404 (18) |
| C2E  | -C3E  | 1.397 (16) | C13E | -C14E | 1.38 (3)   |
| N2E  | -H2E  | 0.8600     | C13F | -C14F | 1.39 (2)   |
| N2F  | -H2F  | 0.8600     | C14E | -C15E | 1.36 (3)   |
| C2F  | -C3F  | 1.397 (16) | C14F | -C15F | 1.33 (2)   |
| C3E  | -C4E  | 1.39 (2)   | C15E | -C16E | 1.40 (3)   |
| C3F  | -C4F  | 1.39 (2)   | C15F | -C16F | 1.39 (2)   |
| C4E  | -C5E  | 1.37 (2)   | N1X  | -C3X  | 1.498 (16) |
| C4F  | -C5F  | 1.36 (2)   | N1X  | -C5X  | 1.495 (17) |
| C5E  | -C6E  | 1.387 (16) | N1X  | -C1X  | 1.479 (16) |
| C5F  | -C6F  | 1.396 (14) | C12  | -O7X  | 1.345 (15) |
| C12  | -O6X  | 1.444 (11) | C17F | -H17F | 0.9300     |
| C12  | -O5X  | 1.358 (15) | C19E | -H19I | 0.9600     |
| C12  | -O8X  | 1.375 (13) | C19E | -H19G | 0.9600     |
| C3E  | -H3E  | 0.9300     | C19E | -H19H | 0.9600     |
| C3F  | -H3F  | 0.9300     | C19F | -H19K | 0.9600     |
| C4E  | -H4E  | 0.9300     | C19F | -H19L | 0.9600     |
| C4F  | -H4F  | 0.9300     | C19F | -H19J | 0.9600     |
| C5E  | -H5E  | 0.9300     | C1X  | -C2X  | 1.48 (2)   |
| C5F  | -H5F  | 0.9300     | N1X  | -H1X  | 0.9800     |
| C7E  | -H7EA | 0.9700     | C3X  | -C4X  | 1.52 (2)   |
| C7E  | -H7EB | 0.9700     | C5X  | -C6X  | 1.54 (2)   |
| C7F  | -H7FA | 0.9700     | C1X  | -H1XA | 0.9700     |
| C7F  | -H7FB | 0.9700     | C1X  | -H1XB | 0.9700     |
| C8E  | -H8E  | 0.9800     | C2X  | -H2XA | 0.9600     |
| C8F  | -H8F  | 0.9800     | C2X  | -H2XB | 0.9600     |
| C9E  | -H9EB | 0.9700     | C2X  | -H2XC | 0.9600     |



|      |       |          |      |       |          |
|------|-------|----------|------|-------|----------|
| C9E  | -H9EA | 0.9700   | N2X  | -C11X | 1.41 (3) |
| C9F  | -H9FB | 0.9700   | N2X  | -C7X  | 1.48 (3) |
| C9F  | -H9FA | 0.9700   | N2X  | -C9X  | 1.43 (3) |
| C12E | -H12E | 0.9300   | C3X  | -H3XB | 0.9700   |
| C12F | -H12F | 0.9300   | C3X  | -H3XA | 0.9700   |
| C13E | -H13E | 0.9300   | C4X  | -H4XB | 0.9600   |
| C13F | -H13F | 0.9300   | C4X  | -H4XC | 0.9600   |
| C14E | -H14E | 0.9300   | C4X  | -H4XA | 0.9600   |
| C14F | -H14F | 0.9300   | C5X  | -H5XB | 0.9700   |
| C15E | -H15E | 0.9300   | C5X  | -H5XA | 0.9700   |
| C15F | -H15F | 0.9300   | C6X  | -H6XC | 0.9600   |
| C17E | -H17E | 0.9300   | C6X  | -H6XA | 0.9600   |
| C6X  | -H6XB | 0.9600   | C13X | -H13D | 0.9700   |
| N2X  | -H2X  | 0.9800   | C14X | -H14C | 0.9600   |
| C7X  | -C8X  | 1.21 (4) | C14X | -H14D | 0.9600   |
| C9X  | -C10X | 1.40 (3) | C14X | -H14G | 0.9600   |
| C11X | -C12X | 1.30 (4) | C15X | -H15C | 0.9700   |
| N3X  | -C17X | 1.39 (3) | C15X | -H15D | 0.9700   |
| N3X  | -C13X | 1.46 (3) | C16X | -H16C | 0.9600   |
| N3X  | -C15X | 1.40 (3) | C16X | -H16B | 0.9600   |
| C7X  | -H7XB | 0.9700   | C16X | -H16A | 0.9600   |
| C7X  | -H7XA | 0.9700   | C17X | -H17D | 0.9700   |
| C9X  | -H9XB | 0.9700   | C17X | -H17C | 0.9800   |
| C9X  | -H9XA | 0.9700   | C18X | -H18B | 0.9600   |
| C10X | -H10A | 0.9600   | C18X | -H18C | 0.9600   |
| C10X | -H10C | 0.9600   | C18X | -H18A | 0.9600   |
| C10X | -H10B | 0.9600   | N4X  | -H4X  | 0.9800   |
| C11X | -H11B | 0.9700   | C19X | -C20X | 1.40 (3) |
| C11X | -H11A | 0.9700   | C21X | -C22X | 1.33 (3) |
| C12X | -H12C | 0.9600   | C23X | -C24X | 1.36 (4) |
| C12X | -H12D | 0.9600   | C19X | -H19M | 0.9700   |
| C12X | -H12G | 0.9600   | C19X | -H19N | 0.9700   |
| N3X  | -H3X  | 0.9800   | C21X | -H21A | 0.9700   |
| C13X | -C14X | 1.35 (3) | C21X | -H21B | 0.9700   |
| C15X | -C16X | 1.33 (3) | C22X | -H22B | 0.9600   |
| C17X | -C18X | 1.28 (3) | C22X | -H22C | 0.9600   |
| N4X  | -C21X | 1.54 (2) | C22X | -H22A | 0.9600   |
| N4X  | -C23X | 1.35 (4) | C23X | -H23A | 0.9700   |
| N4X  | -C19X | 1.53 (3) | C23X | -H23B | 0.9700   |
| C13X | -H13C | 0.9700   | C24X | -H24B | 0.9600   |

### Angles

|     |      |      |           |      |      |       |            |
|-----|------|------|-----------|------|------|-------|------------|
| O1A | -Fe1 | -O1B | 91.4 (3)  | O2E  | -Fe2 | -O2F  | 90.0 (3)   |
| O1A | -Fe1 | -O2A | 165.7 (3) | O2E  | -Fe2 | -N1E  | 75.7 (3)   |
| O1A | -Fe1 | -O2B | 91.0 (3)  | Fe1  | -O1A | -C1A  | 125.1 (6)  |
| O1A | -Fe1 | -N1A | 89.1 (3)  | Fe1  | -O1B | -C1B  | 122.1 (6)  |
| O1A | -Fe1 | -N1B | 104.8 (3) | Fe1  | -O2A | -C18A | 117.5 (6)  |
| O1B | -Fe1 | -O2A | 91.0 (3)  | Fe1  | -O2B | -C18B | 116.5 (6)  |
| O1B | -Fe1 | -O2B | 165.3 (3) | C2A  | -O3A | -C19A | 117.6 (11) |
| O1B | -Fe1 | -N1A | 106.9 (3) | C2B  | -O3B | -C19B | 117.5 (10) |
| O1B | -Fe1 | -N1B | 89.2 (3)  | Fe1  | -N1A | -C7A  | 111.4 (6)  |
| O2A | -Fe1 | -O2B | 90.2 (3)  | Fe1  | -N1A | -C8A  | 108.7 (6)  |
| O2A | -Fe1 | -N1A | 76.7 (3)  | C7A  | -N1A | -C8A  | 114.6 (8)  |
| O2A | -Fe1 | -N1B | 89.3 (3)  | Fe1  | -N1B | -C8B  | 108.1 (6)  |
| O2B | -Fe1 | -N1A | 87.6 (3)  | Fe1  | -N1B | -C7B  | 112.1 (6)  |
| O2B | -Fe1 | -N1B | 76.2 (3)  | C7B  | -N1B | -C8B  | 115.0 (8)  |
| N1A | -Fe1 | -N1B | 158.6 (3) | C16A | -N2A | -C17A | 110.2 (13) |
| O2E | -Fe2 | -N1F | 92.2 (3)  | C16B | -N2B | -C17B | 108.8 (12) |
| O2F | -Fe2 | -N1E | 89.1 (3)  | Fe1  | -N1A | -H1A  | 107.00     |
| O2F | -Fe2 | -N1F | 76.7 (3)  | O1A  | -C1A | -C2A  | 120.3 (10) |
| N1E | -Fe2 | -N1F | 161.4 (3) | O1A  | -C1A | -C6A  | 122.1 (10) |

|      |       |       |            |      |       |       |            |
|------|-------|-------|------------|------|-------|-------|------------|
| O1E  | -Fe2  | -O1F  | 92.8 (3)   | C2A  | -C1A  | -C6A  | 117.4 (10) |
| O1E  | -Fe2  | -O2E  | 165.6 (3)  | C8A  | -N1A  | -H1A  | 107.00     |
| O1E  | -Fe2  | -O2F  | 91.1 (3)   | C7A  | -N1A  | -H1A  | 107.00     |
| O1E  | -Fe2  | -N1E  | 90.0 (3)   | O1B  | -C1B  | -C6B  | 122.1 (9)  |
| O1E  | -Fe2  | -N1F  | 102.0 (3)  | O1B  | -C1B  | -C2B  | 120.7 (9)  |
| O1F  | -Fe2  | -O2E  | 89.6 (3)   | Fe1  | -N1B  | -H1B  | 107.00     |
| O1F  | -Fe2  | -O2F  | 165.5 (3)  | C7B  | -N1B  | -H1B  | 107.00     |
| O1F  | -Fe2  | -N1E  | 104.8 (3)  | C8B  | -N1B  | -H1B  | 107.00     |
| O1F  | -Fe2  | -N1F  | 88.8 (3)   | C2B  | -C1B  | -C6B  | 117.3 (10) |
| Fe2  | -O1E  | -C1E  | 121.3 (6)  | N1A  | -C7A  | -C6A  | 111.4 (8)  |
| Fe2  | -O1F  | -C1F  | 128.7 (6)  | N1B  | -C7B  | -C6B  | 109.9 (8)  |
| C16A | -N2A  | -H2A  | 125.00     | C9A  | -C8A  | -C18A | 111.8 (9)  |
| C17A | -N2A  | -H2A  | 125.00     | N1A  | -C8A  | -C9A  | 114.3 (9)  |
| O3A  | -C2A  | -C3A  | 126.1 (13) | N1A  | -C8A  | -C18A | 108.9 (9)  |
| C1A  | -C2A  | -C3A  | 119.7 (13) | N1B  | -C8B  | -C18B | 107.9 (8)  |
| O3A  | -C2A  | -C1A  | 114.2 (9)  | N1B  | -C8B  | -C9B  | 114.0 (9)  |
| C16B | -N2B  | -H2B  | 126.00     | C9B  | -C8B  | -C18B | 113.7 (9)  |
| O3B  | -C2B  | -C1B  | 114.9 (9)  | C8A  | -C9A  | -C10A | 115.4 (10) |
| O3B  | -C2B  | -C3B  | 124.2 (11) | C8B  | -C9B  | -C10B | 115.8 (9)  |
| C1B  | -C2B  | -C3B  | 120.9 (11) | C9A  | -C10A | -C11A | 125.5 (12) |
| C17B | -N2B  | -H2B  | 126.00     | C9A  | -C10A | -C17A | 129.1 (13) |
| Fe2  | -O2E  | -C18E | 115.9 (7)  | C11A | -C10A | -C17A | 105.3 (12) |
| Fe2  | -O2F  | -C18F | 119.7 (6)  | C11B | -C10B | -C17B | 106.4 (11) |
| C2A  | -C3A  | -C4A  | 120.5 (14) | C9B  | -C10B | -C11B | 128.4 (11) |
| C2B  | -C3B  | -C4B  | 120.8 (12) | C9B  | -C10B | -C17B | 125.1 (11) |
| C2E  | -O3E  | -C19E | 117.6 (10) | C10A | -C11A | -C12A | 135.6 (12) |
| C2F  | -O3F  | -C19F | 119.3 (12) | C10A | -C11A | -C16A | 107.9 (14) |
| C3A  | -C4A  | -C5A  | 122.2 (13) | C12A | -C11A | -C16A | 116.5 (14) |
| C3B  | -C4B  | -C5B  | 120.4 (12) | C12B | -C11B | -C16B | 116.8 (11) |
| C4A  | -C5A  | -C6A  | 118.4 (13) | C10B | -C11B | -C16B | 106.7 (11) |
| C4B  | -C5B  | -C6B  | 120.7 (13) | C10B | -C11B | -C12B | 136.5 (13) |
| C1A  | -C6A  | -C7A  | 118.8 (10) | C11A | -C12A | -C13A | 122.9 (13) |
| C5A  | -C6A  | -C7A  | 119.4 (11) | C11B | -C12B | -C13B | 121.6 (14) |
| C1A  | -C6A  | -C5A  | 121.8 (11) | C12A | -C13A | -C14A | 119.3 (16) |
| C5B  | -C6B  | -C7B  | 122.6 (10) | C12B | -C13B | -C14B | 119.2 (16) |
| C1B  | -C6B  | -C5B  | 119.9 (11) | C13A | -C14A | -C15A | 119.2 (17) |
| C1B  | -C6B  | -C7B  | 117.5 (10) | C13B | -C14B | -C15B | 123.9 (16) |
| C14A | -C15A | -C16A | 121.7 (16) | C16E | -N2E  | -C17E | 110.0 (13) |
| C14B | -C15B | -C16B | 116.5 (15) | C16F | -N2F  | -C17F | 109.3 (11) |
| C11A | -C16A | -C15A | 120.5 (18) | C2A  | -C3A  | -H3A  | 120.00     |
| N2A  | -C16A | -C11A | 106.1 (15) | C4A  | -C3A  | -H3A  | 120.00     |
| N2A  | -C16A | -C15A | 133.4 (15) | C4B  | -C3B  | -H3B  | 120.00     |
| C11B | -C16B | -C15B | 122.0 (13) | C2B  | -C3B  | -H3B  | 120.00     |
| N2B  | -C16B | -C11B | 107.9 (12) | C3A  | -C4A  | -H4A  | 119.00     |
| N2B  | -C16B | -C15B | 130.1 (14) | C5A  | -C4A  | -H4A  | 119.00     |
| N2A  | -C17A | -C10A | 110.5 (14) | C3B  | -C4B  | -H4B  | 120.00     |
| N2B  | -C17B | -C10B | 110.3 (12) | C5B  | -C4B  | -H4B  | 120.00     |
| O2A  | -C18A | -C8A  | 118.2 (10) | C6A  | -C5A  | -H5A  | 121.00     |
| O4A  | -C18A | -C8A  | 118.3 (11) | C4A  | -C5A  | -H5A  | 121.00     |
| O2A  | -C18A | -O4A  | 123.5 (10) | C6B  | -C5B  | -H5B  | 120.00     |
| O2B  | -C18B | -C8B  | 118.0 (9)  | C4B  | -C5B  | -H5B  | 120.00     |
| O4B  | -C18B | -C8B  | 117.4 (10) | N1A  | -C7A  | -H7AA | 109.00     |
| O2B  | -C18B | -O4B  | 124.7 (10) | N1A  | -C7A  | -H7AB | 109.00     |
| O3X  | -C11  | -O4X  | 112.2 (11) | C6A  | -C7A  | -H7AA | 109.00     |
| O1X  | -C11  | -O3X  | 109.3 (9)  | C6A  | -C7A  | -H7AB | 109.00     |
| O1X  | -C11  | -O4X  | 109.5 (9)  | H7AA | -C7A  | -H7AB | 108.00     |
| O1X  | -C11  | -O2X  | 107.8 (10) | C6B  | -C7B  | -H7BA | 110.00     |
| O2X  | -C11  | -O4X  | 106.4 (11) | N1B  | -C7B  | -H7BA | 110.00     |
| O2X  | -C11  | -O3X  | 111.5 (10) | C6B  | -C7B  | -H7BB | 110.00     |
| Fe2  | -N1E  | -C8E  | 107.4 (6)  | H7BA | -C7B  | -H7BB | 108.00     |
| C7E  | -N1E  | -C8E  | 113.8 (8)  | N1B  | -C7B  | -H7BB | 110.00     |
| Fe2  | -N1E  | -C7E  | 111.9 (6)  | C9A  | -C8A  | -H8A  | 107.00     |

|      |       |       |            |      |       |       |            |
|------|-------|-------|------------|------|-------|-------|------------|
| Fe2  | -N1F  | -C8F  | 108.7 (6)  | C18A | -C8A  | -H8A  | 107.00     |
| C7F  | -N1F  | -C8F  | 114.9 (7)  | N1A  | -C8A  | -H8A  | 107.00     |
| Fe2  | -N1F  | -C7F  | 111.8 (6)  | C9B  | -C8B  | -H8B  | 107.00     |
| C18B | -C8B  | -H8B  | 107.00     | N2A  | -C17A | -H17A | 125.00     |
| N1B  | -C8B  | -H8B  | 107.00     | C10A | -C17A | -H17A | 125.00     |
| C10A | -C9A  | -H9AA | 108.00     | C10B | -C17B | -H17B | 125.00     |
| C10A | -C9A  | -H9AB | 109.00     | N2B  | -C17B | -H17B | 125.00     |
| C8A  | -C9A  | -H9AB | 108.00     | O3A  | -C19A | -H19D | 110.00     |
| C8A  | -C9A  | -H9AA | 108.00     | H19E | -C19A | -H19F | 109.00     |
| H9AA | -C9A  | -H9AB | 108.00     | H19D | -C19A | -H19E | 110.00     |
| C10B | -C9B  | -H9BA | 108.00     | H19D | -C19A | -H19F | 109.00     |
| H9BA | -C9B  | -H9BB | 107.00     | O3A  | -C19A | -H19F | 109.00     |
| C8B  | -C9B  | -H9BB | 108.00     | O3A  | -C19A | -H19E | 109.00     |
| C10B | -C9B  | -H9BB | 108.00     | H19B | -C19B | -H19C | 109.00     |
| C8B  | -C9B  | -H9BA | 108.00     | H19A | -C19B | -H19C | 110.00     |
| C13A | -C12A | -H12A | 119.00     | O3B  | -C19B | -H19C | 109.00     |
| C11A | -C12A | -H12A | 119.00     | O3B  | -C19B | -H19A | 110.00     |
| C11B | -C12B | -H12B | 119.00     | O3B  | -C19B | -H19B | 109.00     |
| C13B | -C12B | -H12B | 119.00     | H19A | -C19B | -H19B | 109.00     |
| C14A | -C13A | -H13A | 120.00     | C2E  | -C1E  | -C6E  | 118.9 (10) |
| C12A | -C13A | -H13A | 120.00     | O1E  | -C1E  | -C2E  | 119.9 (9)  |
| C12B | -C13B | -H13B | 120.00     | O1E  | -C1E  | -C6E  | 121.2 (9)  |
| C14B | -C13B | -H13B | 120.00     | C8E  | -N1E  | -H1E  | 108.00     |
| C15A | -C14A | -H14A | 121.00     | Fe2  | -N1E  | -H1E  | 108.00     |
| C13A | -C14A | -H14A | 120.00     | C7E  | -N1E  | -H1E  | 108.00     |
| C13B | -C14B | -H14B | 118.00     | C7F  | -N1F  | -H1F  | 107.00     |
| C15B | -C14B | -H14B | 118.00     | C8F  | -N1F  | -H1F  | 107.00     |
| C16A | -C15A | -H15A | 119.00     | O1F  | -C1F  | -C2F  | 120.4 (10) |
| C14A | -C15A | -H15A | 119.00     | O1F  | -C1F  | -C6F  | 120.7 (9)  |
| C16B | -C15B | -H15B | 122.00     | Fe2  | -N1F  | -H1F  | 107.00     |
| C14B | -C15B | -H15B | 122.00     | C2F  | -C1F  | -C6F  | 118.7 (10) |
| C16E | -N2E  | -H2E  | 125.00     | C9F  | -C8F  | -C18F | 111.8 (9)  |
| C17E | -N2E  | -H2E  | 125.00     | N1F  | -C8F  | -C18F | 109.5 (8)  |
| O3E  | -C2E  | -C3E  | 123.7 (11) | C8E  | -C9E  | -C10E | 115.9 (9)  |
| O3E  | -C2E  | -C1E  | 114.9 (9)  | C8F  | -C9F  | -C10F | 114.1 (8)  |
| C1E  | -C2E  | -C3E  | 121.4 (11) | C11E | -C10E | -C17E | 106.0 (12) |
| C16F | -N2F  | -H2F  | 125.00     | C9E  | -C10E | -C11E | 126.1 (12) |
| C17F | -N2F  | -H2F  | 125.00     | C9E  | -C10E | -C17E | 127.9 (11) |
| C1F  | -C2F  | -C3F  | 120.9 (13) | C11F | -C10F | -C17F | 105.6 (10) |
| O3F  | -C2F  | -C1F  | 115.1 (10) | C9F  | -C10F | -C11F | 126.1 (10) |
| O3F  | -C2F  | -C3F  | 124.0 (11) | C9F  | -C10F | -C17F | 128.2 (11) |
| C2E  | -C3E  | -C4E  | 118.4 (11) | C10E | -C11E | -C12E | 133.1 (14) |
| C2F  | -C3F  | -C4F  | 119.4 (12) | C10E | -C11E | -C16E | 108.5 (13) |
| C3E  | -C4E  | -C5E  | 120.7 (11) | C12E | -C11E | -C16E | 118.4 (13) |
| C3F  | -C4F  | -C5F  | 120.6 (12) | C10F | -C11F | -C12F | 135.7 (10) |
| C4E  | -C5E  | -C6E  | 121.2 (12) | C10F | -C11F | -C16F | 106.7 (10) |
| C4F  | -C5F  | -C6F  | 120.7 (13) | C12F | -C11F | -C16F | 117.5 (10) |
| C5E  | -C6E  | -C7E  | 122.3 (11) | C11E | -C12E | -C13E | 118.1 (15) |
| C1E  | -C6E  | -C7E  | 118.4 (10) | C11F | -C12F | -C13F | 119.5 (11) |
| C1E  | -C6E  | -C5E  | 119.3 (11) | C12E | -C13E | -C14E | 120.8 (17) |
| C1F  | -C6F  | -C7F  | 119.5 (8)  | C12F | -C13F | -C14F | 120.8 (13) |
| C5F  | -C6F  | -C7F  | 120.9 (10) | C13E | -C14E | -C15E | 124.3 (16) |
| C1F  | -C6F  | -C5F  | 119.6 (10) | C13F | -C14F | -C15F | 120.7 (14) |
| N1E  | -C7E  | -C6E  | 110.7 (9)  | C14E | -C15E | -C16E | 115.0 (18) |
| N1F  | -C7F  | -C6F  | 112.3 (8)  | C14F | -C15F | -C16F | 119.8 (13) |
| N1E  | -C8E  | -C9E  | 113.5 (9)  | N2E  | -C16E | -C15E | 130.2 (17) |
| C9E  | -C8E  | -C18E | 112.5 (9)  | N2E  | -C16E | -C11E | 106.5 (14) |
| N1E  | -C8E  | -C18E | 105.7 (8)  | C11E | -C16E | -C15E | 123.4 (16) |
| N1F  | -C8F  | -C9F  | 113.8 (8)  | C11F | -C16F | -C15F | 121.7 (12) |
| N2F  | -C16F | -C11F | 107.5 (11) | C6E  | -C5E  | -H5E  | 119.00     |
| N2F  | -C16F | -C15F | 130.7 (12) | C6F  | -C5F  | -H5F  | 120.00     |
| N2E  | -C17E | -C10E | 109.1 (12) | C4F  | -C5F  | -H5F  | 120.00     |

|      |       |       |            |      |       |       |            |
|------|-------|-------|------------|------|-------|-------|------------|
| N2F  | -C17F | -C10F | 111.0 (12) | H7EA | -C7E  | -H7EB | 108.00     |
| O4E  | -C18E | -C8E  | 117.0 (11) | C6E  | -C7E  | -H7EB | 110.00     |
| O2E  | -C18E | -C8E  | 117.8 (10) | N1E  | -C7E  | -H7EB | 109.00     |
| O2E  | -C18E | -O4E  | 125.1 (11) | C6E  | -C7E  | -H7EA | 110.00     |
| O2F  | -C18F | -O4F  | 124.7 (10) | N1E  | -C7E  | -H7EA | 109.00     |
| O2F  | -C18F | -C8F  | 116.0 (9)  | N1F  | -C7F  | -H7FB | 109.00     |
| O4F  | -C18F | -C8F  | 119.4 (10) | C6F  | -C7F  | -H7FA | 109.00     |
| C3X  | -N1X  | -C5X  | 109.4 (11) | C6F  | -C7F  | -H7FB | 109.00     |
| C1X  | -N1X  | -C5X  | 113.8 (11) | N1F  | -C7F  | -H7FA | 109.00     |
| C1X  | -N1X  | -C3X  | 115.2 (9)  | H7FA | -C7F  | -H7FB | 108.00     |
| O7X  | -C12  | -O8X  | 111.3 (9)  | N1E  | -C8E  | -H8E  | 108.00     |
| O6X  | -C12  | -O8X  | 108.8 (8)  | C9E  | -C8E  | -H8E  | 108.00     |
| O5X  | -C12  | -O6X  | 109.3 (8)  | C18E | -C8E  | -H8E  | 108.00     |
| O5X  | -C12  | -O7X  | 108.5 (9)  | C18F | -C8F  | -H8F  | 107.00     |
| O5X  | -C12  | -O8X  | 108.2 (10) | N1F  | -C8F  | -H8F  | 107.00     |
| O6X  | -C12  | -O7X  | 110.7 (7)  | C9F  | -C8F  | -H8F  | 107.00     |
| C2E  | -C3E  | -H3E  | 121.00     | H9EA | -C9E  | -H9EB | 107.00     |
| C4E  | -C3E  | -H3E  | 121.00     | C8E  | -C9E  | -H9EB | 108.00     |
| C4F  | -C3F  | -H3F  | 120.00     | C10E | -C9E  | -H9EA | 108.00     |
| C2F  | -C3F  | -H3F  | 120.00     | C10E | -C9E  | -H9EB | 108.00     |
| C3E  | -C4E  | -H4E  | 120.00     | C8E  | -C9E  | -H9EA | 108.00     |
| C5E  | -C4E  | -H4E  | 120.00     | C8F  | -C9F  | -H9FB | 109.00     |
| C5F  | -C4F  | -H4F  | 120.00     | C10F | -C9F  | -H9FA | 109.00     |
| C3F  | -C4F  | -H4F  | 120.00     | C8F  | -C9F  | -H9FA | 109.00     |
| C4E  | -C5E  | -H5E  | 119.00     | H9FA | -C9F  | -H9FB | 108.00     |
| C10F | -C9F  | -H9FB | 109.00     | O3F  | -C19F | -H19L | 109.00     |
| C13E | -C12E | -H12E | 121.00     | H19J | -C19F | -H19K | 109.00     |
| C11E | -C12E | -H12E | 121.00     | H19K | -C19F | -H19L | 110.00     |
| C11F | -C12F | -H12F | 120.00     | O3F  | -C19F | -H19J | 109.00     |
| C13F | -C12F | -H12F | 120.00     | H19J | -C19F | -H19L | 110.00     |
| C12E | -C13E | -H13E | 120.00     | N1X  | -C1X  | -C2X  | 114.6 (13) |
| C14E | -C13E | -H13E | 120.00     | C1X  | -N1X  | -H1X  | 106.00     |
| C14F | -C13F | -H13F | 120.00     | C5X  | -N1X  | -H1X  | 106.00     |
| C12F | -C13F | -H13F | 120.00     | C3X  | -N1X  | -H1X  | 106.00     |
| C13E | -C14E | -H14E | 118.00     | N1X  | -C3X  | -C4X  | 111.2 (11) |
| C15E | -C14E | -H14E | 118.00     | N1X  | -C5X  | -C6X  | 112.2 (12) |
| C15F | -C14F | -H14F | 120.00     | C2X  | -C1X  | -H1XA | 109.00     |
| C13F | -C14F | -H14F | 120.00     | C2X  | -C1X  | -H1XB | 109.00     |
| C16E | -C15E | -H15E | 122.00     | H1XA | -C1X  | -H1XB | 108.00     |
| C14E | -C15E | -H15E | 123.00     | N1X  | -C1X  | -H1XB | 109.00     |
| C14F | -C15F | -H15F | 120.00     | N1X  | -C1X  | -H1XA | 109.00     |
| C16F | -C15F | -H15F | 120.00     | H2XA | -C2X  | -H2XC | 109.00     |
| C10E | -C17E | -H17E | 125.00     | C7X  | -N2X  | -C9X  | 107 (2)    |
| N2E  | -C17E | -H17E | 125.00     | C7X  | -N2X  | -C11X | 109 (2)    |
| C10F | -C17F | -H17F | 125.00     | C1X  | -C2X  | -H2XA | 110.00     |
| N2F  | -C17F | -H17F | 125.00     | C1X  | -C2X  | -H2XB | 110.00     |
| O3E  | -C19E | -H19H | 110.00     | C1X  | -C2X  | -H2XC | 109.00     |
| O3E  | -C19E | -H19G | 110.00     | H2XA | -C2X  | -H2XB | 109.00     |
| O3E  | -C19E | -H19I | 110.00     | H2XB | -C2X  | -H2XC | 109.00     |
| H19G | -C19E | -H19H | 109.00     | C9X  | -N2X  | -C11X | 111.3 (19) |
| H19G | -C19E | -H19I | 109.00     | N1X  | -C3X  | -H3XB | 109.00     |
| H19H | -C19E | -H19I | 109.00     | N1X  | -C3X  | -H3XA | 109.00     |
| O3F  | -C19F | -H19K | 109.00     | H3XA | -C3X  | -H3XB | 108.00     |
| C4X  | -C3X  | -H3XB | 109.00     | C8X  | -C7X  | -H7XA | 106.00     |
| C4X  | -C3X  | -H3XA | 109.00     | N2X  | -C7X  | -H7XB | 106.00     |
| C3X  | -C4X  | -H4XB | 109.00     | H7XA | -C7X  | -H7XB | 106.00     |
| C3X  | -C4X  | -H4XA | 109.00     | N2X  | -C7X  | -H7XA | 106.00     |
| C3X  | -C4X  | -H4XC | 110.00     | C8X  | -C7X  | -H7XB | 106.00     |
| H4XA | -C4X  | -H4XB | 109.00     | H9XA | -C9X  | -H9XB | 107.00     |
| H4XB | -C4X  | -H4XC | 110.00     | C10X | -C9X  | -H9XA | 107.00     |
| H4XA | -C4X  | -H4XC | 109.00     | C10X | -C9X  | -H9XB | 107.00     |
| C6X  | -C5X  | -H5XB | 109.00     | N2X  | -C9X  | -H9XA | 106.00     |

|      |       |       |            |      |       |       |            |
|------|-------|-------|------------|------|-------|-------|------------|
| H5XA | -C5X  | -H5XB | 108.00     | N2X  | -C9X  | -H9XB | 107.00     |
| C6X  | -C5X  | -H5XA | 109.00     | C9X  | -C10X | -H10A | 110.00     |
| N1X  | -C5X  | -H5XA | 109.00     | H10A | -C10X | -H10C | 110.00     |
| N1X  | -C5X  | -H5XB | 109.00     | H10B | -C10X | -H10C | 109.00     |
| H6XB | -C6X  | -H6XC | 109.00     | C9X  | -C10X | -H10B | 109.00     |
| C5X  | -C6X  | -H6XB | 109.00     | H10A | -C10X | -H10B | 109.00     |
| C5X  | -C6X  | -H6XC | 109.00     | C9X  | -C10X | -H10C | 109.00     |
| C5X  | -C6X  | -H6XA | 110.00     | N2X  | -C11X | -H11A | 104.00     |
| H6XA | -C6X  | -H6XC | 109.00     | C12X | -C11X | -H11A | 105.00     |
| H6XA | -C6X  | -H6XB | 110.00     | N2X  | -C11X | -H11B | 105.00     |
| C11X | -N2X  | -H2X  | 110.00     | H11A | -C11X | -H11B | 106.00     |
| C9X  | -N2X  | -H2X  | 110.00     | C12X | -C11X | -H11B | 105.00     |
| C7X  | -N2X  | -H2X  | 110.00     | H12C | -C12X | -H12G | 109.00     |
| N2X  | -C7X  | -C8X  | 127 (3)    | H12C | -C12X | -H12D | 109.00     |
| N2X  | -C9X  | -C10X | 123.0 (17) | C11X | -C12X | -H12D | 110.00     |
| N2X  | -C11X | -C12X | 131 (3)    | H12D | -C12X | -H12G | 110.00     |
| C13X | -N3X  | -C17X | 115.0 (19) | C11X | -C12X | -H12G | 109.00     |
| C15X | -N3X  | -C17X | 108 (2)    | C11X | -C12X | -H12C | 109.00     |
| C13X | -N3X  | -C15X | 105.1 (19) | C15X | -N3X  | -H3X  | 110.00     |
| 13X  | -N3X  | -H3X  | 110.00     | C15X | -C16X | -H16A | 109.00     |
| C17X | -N3X  | -H3X  | 109.00     | C15X | -C16X | -H16B | 110.00     |
| N3X  | -C13X | -C14X | 124 (2)    | C18X | -C17X | -H17D | 104.00     |
| N3X  | -C15X | -C16X | 126.7 (18) | N3X  | -C17X | -H17C | 104.00     |
| N3X  | -C17X | -C18X | 132 (3)    | C18X | -C17X | -H17C | 104.00     |
| C19X | -N4X  | -C23X | 112 (2)    | N3X  | -C17X | -H17D | 104.00     |
| C21X | -N4X  | -C23X | 118.4 (19) | H17C | -C17X | -H17D | 105.00     |
| C19X | -N4X  | -C21X | 110.6 (17) | C17X | -C18X | -H18C | 109.00     |
| H13C | -C13X | -H13D | 106.00     | H18A | -C18X | -H18C | 110.00     |
| N3X  | -C13X | -H13C | 106.00     | H18B | -C18X | -H18C | 109.00     |
| N3X  | -C13X | -H13D | 106.00     | C17X | -C18X | -H18B | 109.00     |
| C14X | -C13X | -H13C | 106.00     | C17X | -C18X | -H18A | 109.00     |
| C14X | -C13X | -H13D | 106.00     | H18A | -C18X | -H18B | 109.00     |
| C13X | -C14X | -H14C | 109.00     | C21X | -N4X  | -H4X  | 105.00     |
| C13X | -C14X | -H14G | 109.00     | C23X | -N4X  | -H4X  | 105.00     |
| H14C | -C14X | -H14D | 110.00     | C19X | -N4X  | -H4X  | 105.00     |
| C13X | -C14X | -H14D | 109.00     | N4X  | -C19X | -C20X | 122.5 (19) |
| H14D | -C14X | -H14G | 110.00     | N4X  | -C21X | -C22X | 118.0 (19) |
| H14C | -C14X | -H14G | 109.00     | N4X  | -C23X | -C24X | 130 (2)    |
| N3X  | -C15X | -H15D | 106.00     | N4X  | -C19X | -H19M | 107.00     |
| N3X  | -C15X | -H15C | 106.00     | N4X  | -C19X | -H19N | 107.00     |
| C16X | -C15X | -H15D | 106.00     | C20X | -C19X | -H19M | 107.00     |
| H15C | -C15X | -H15D | 106.00     | C20X | -C19X | -H19N | 106.00     |
| C16X | -C15X | -H15C | 106.00     | H19M | -C19X | -H19N | 107.00     |
| H16B | -C16X | -H16C | 110.00     | C22X | -C21X | -H21B | 108.00     |
| H16A | -C16X | -H16C | 109.00     | N4X  | -C21X | -H21A | 108.00     |
| C15X | -C16X | -H16C | 109.00     | H21A | -C21X | -H21B | 107.00     |
| H16A | -C16X | -H16B | 109.00     | C22X | -C21X | -H21A | 108.00     |
| N4X  | -C21X | -H21B | 108.00     | N4X  | -C23X | -H23A | 105.00     |
| C21X | -C22X | -H22B | 109.00     | C24X | -C23X | -H23B | 105.00     |
| C21X | -C22X | -H22A | 109.00     | H23A | -C23X | -H23B | 106.00     |
| C21X | -C22X | -H22C | 110.00     | H24B | -C24X | -H24C | 110.00     |
| H22A | -C22X | -H22B | 109.00     | H24A | -C24X | -H24B | 110.00     |
| H22A | -C22X | -H22C | 110.00     | H24A | -C24X | -H24C | 109.00     |
| H22B | -C22X | -H22C | 110.00     | C23X | -C24X | -H24A | 110.00     |
| N4X  | -C23X | -H23B | 105.00     | C23X | -C24X | -H24B | 110.00     |
| C24X | -C23X | -H23A | 105.00     | C23X | -C24X | -H24C | 109.00     |

---

**Table S11.** Non-covalent interactions in Complex **5**.

| Atoms         | D-H (Å) | H...A (Å) | D...A (Å)  | DHA (°) |
|---------------|---------|-----------|------------|---------|
| N1X-H1X...O4F | 0.98    | 1.71      | 2.687 (12) | 172     |
| N2A-H2A...O1B | 0.86    | 2.26      | 3.113 (15) | 173     |
| N2B-H2B...O6X | 0.86    | 2.21      | 3.057 (15) | 167     |
| N2E-H2E...O1X | 0.86    | 2.19      | 2.989 (19) | 155     |
| N2F-H2F...O1E | 0.86    | 2.25      | 3.078 (13) | 161     |
| N2X-H2X...O4E | 0.98    | 1.69      | 2.672 (14) | 175     |
| N3X-H3X...O4B | 0.98    | 1.75      | 2.724 (13) | 171     |
| N4X-H4X...O4A | 0.98    | 1.63      | 2.602 (14) | 169     |

---

## G. FTIR of the complexes.

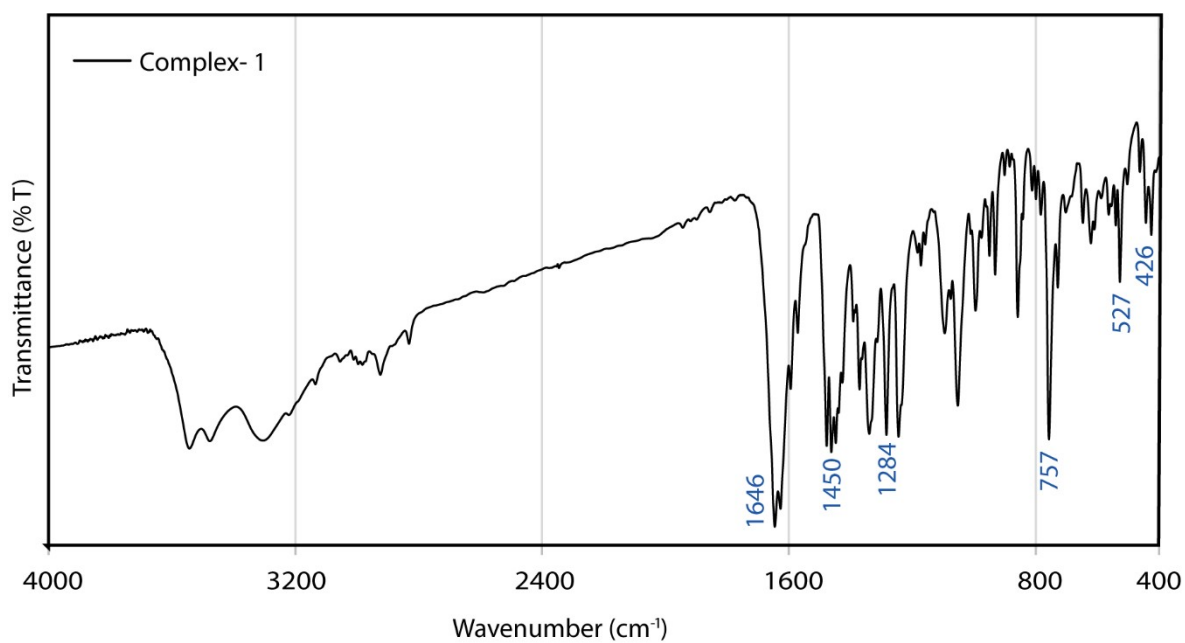

**Figure S20.** FTIR spectrum of **1**.

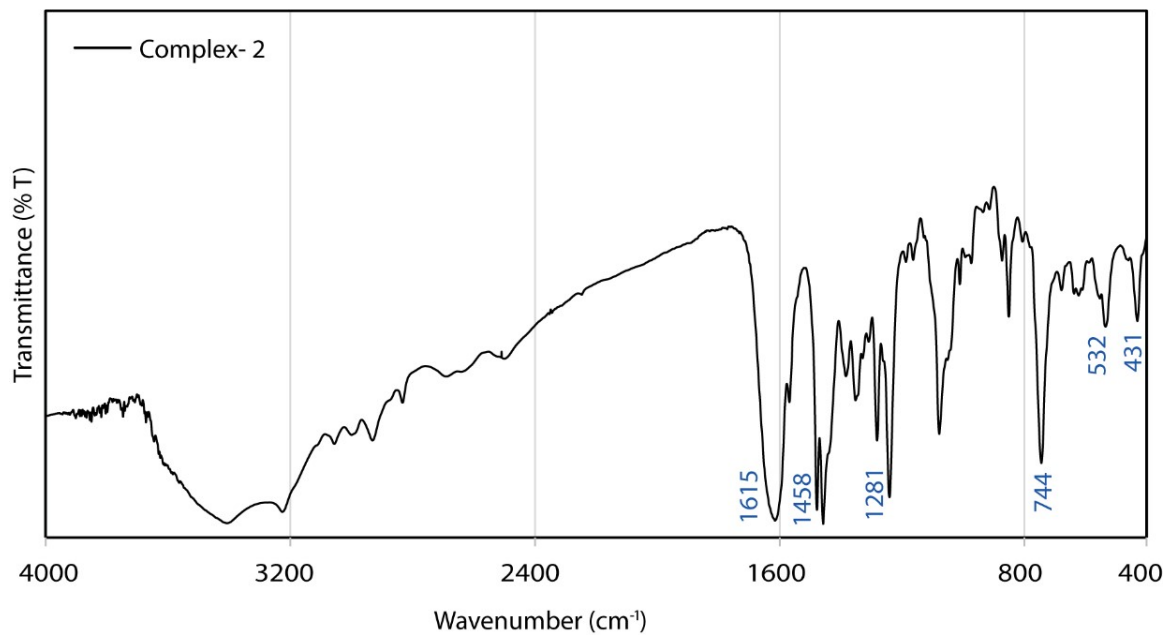

**Figure S21.** FTIR spectrum of **2**.

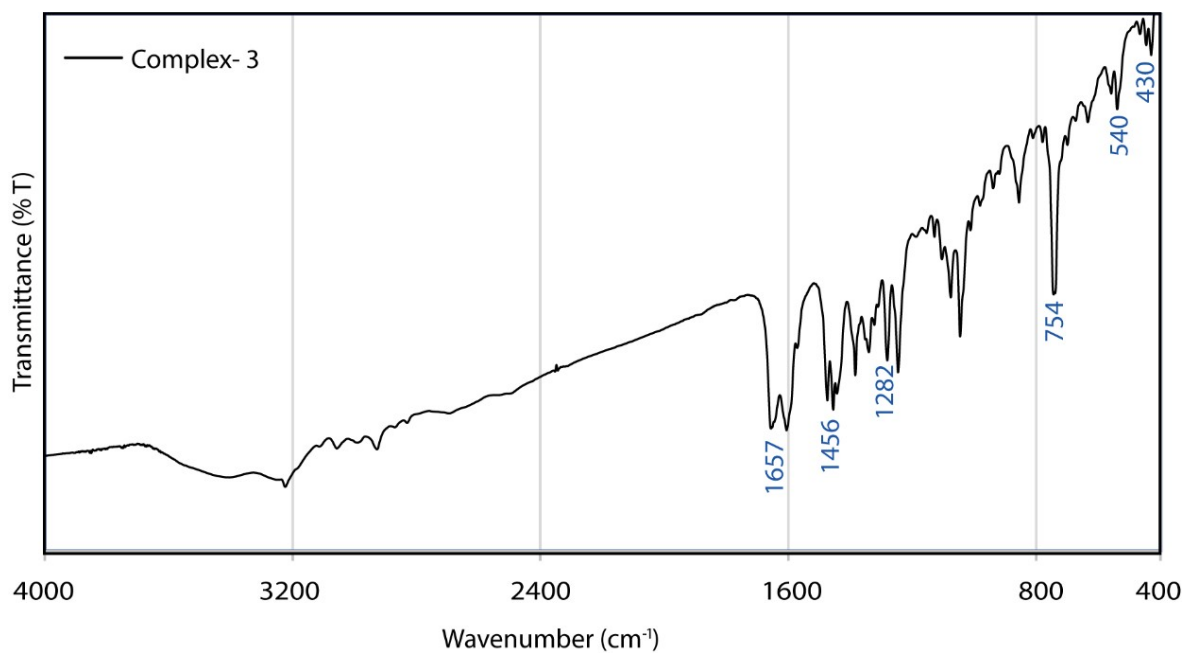

**Figure S22.** FTIR spectrum of **3**.

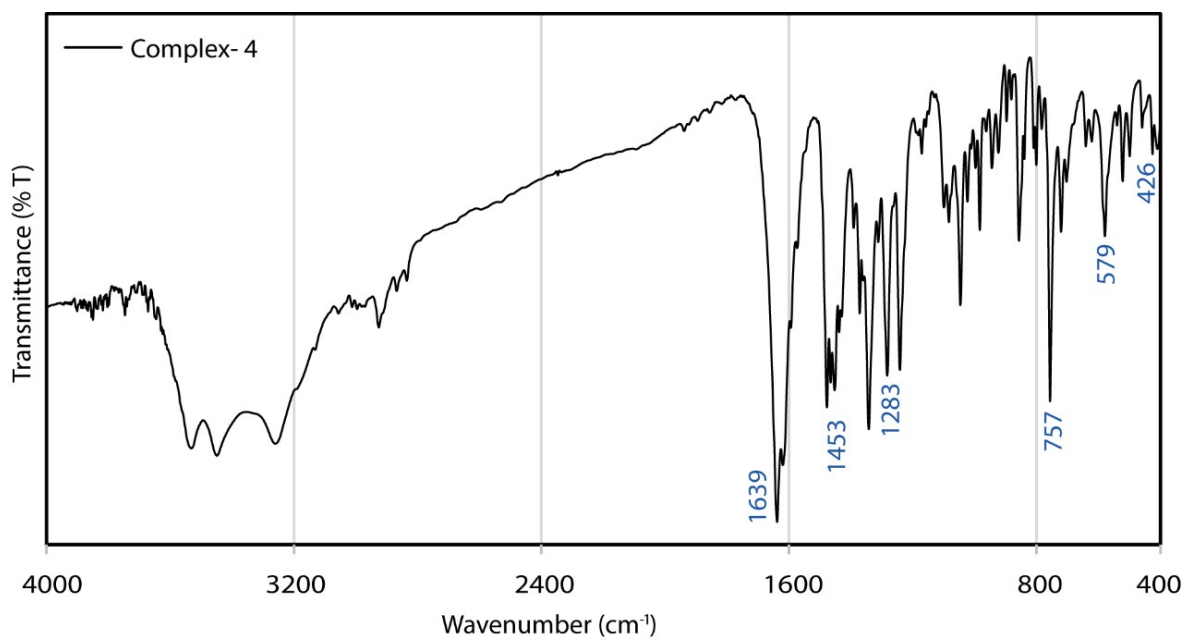

**Figure S23.** FTIR spectrum of **4**.



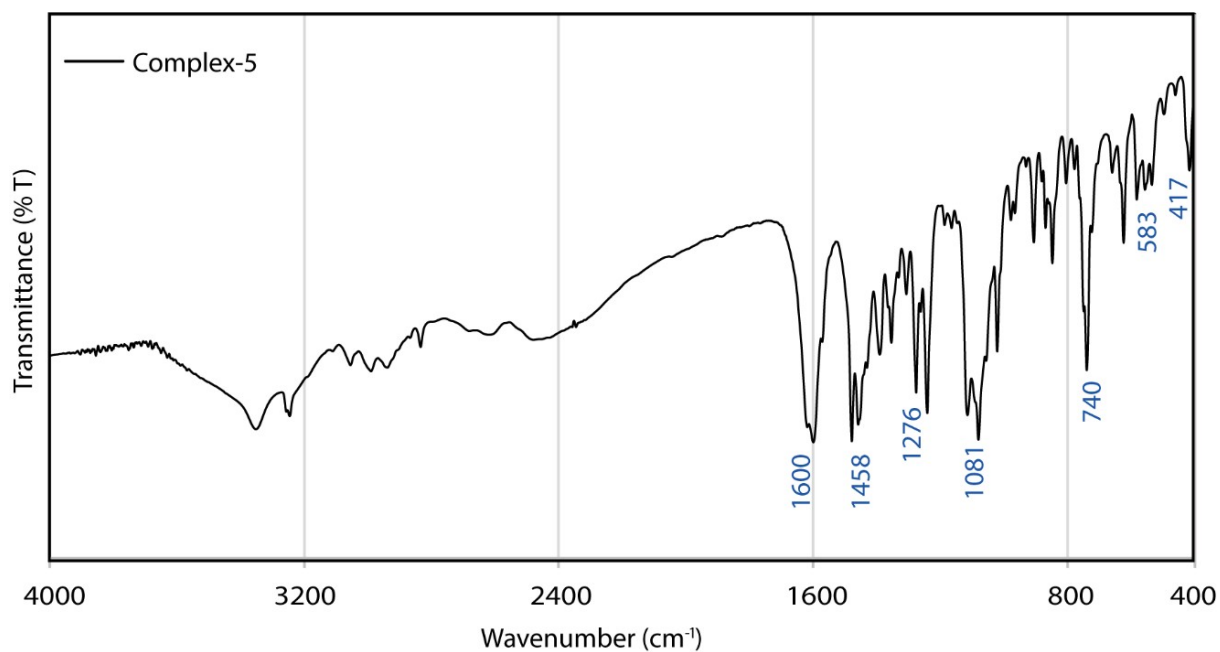

**Figure S24.** FTIR spectrum of **5**.
